# Supplementary material for: Synthetic, Structural, and Anticancer Activity Evaluation Studies on Novel Pyrazolylnucleosides
Source: PubMed Central journal article supplement (PMC6864788; doi:10.3390/molecules24213922), 2019-10-30
Supplement: molecules-24-03922-s001.pdf [file molecules-24-03922-s001.pdf]

**SUPPORTING INFORMATION OF THE SYNTHETIC, STRUCTURAL AND  
ANTICANCER ACTIVITY EVALUATION STUDIES ON NOVEL  
PYRAZOLYLNUCLEOSIDES**

**EXPERIMENTAL**

Reactions were conducted under an atmosphere of nitrogen in anhydrous solvents. Column chromatography was carried out using silica gel (100-200 mesh). Melting points were determined using concentrated H<sub>2</sub>SO<sub>4</sub> acid bath and are uncorrected. Analytical TLCs were performed on pre-coated Merck silica gel 60F<sub>254</sub> plates; the spots were detected either using UV light or by charring with 4 % alcoholic sulfuric acid. The IR spectra were recorded on a Perkin-Elmer 2000 FT-IR spectrophotometer. The optical rotations were measured with Bellingham-Stanley AD 220 polarimeter, the concentrations are expressed as g/mL. The <sup>1</sup>H-NMR and <sup>13</sup>C-NMR spectra were recorded on a Bruker Avance 300 spectrometer at 300 and 75.5 MHz, respectively in CDCl<sub>3</sub>, DMSO-d<sub>6</sub> or CD<sub>3</sub>CN. All the 2D measurements were performed in acetone-d<sub>6</sub> on a Bruker Avance 400 spectrometer. Chemical shifts are relative to internal TMS. Assignments are based on COSY, NOESY, HMBC (using Bruker's microprogram inv4gslplrnd, which includes low-pass J-filter to suppress one-bond correlations), HSQC and JRES spectra. The chemical shift values are reported as δ ppm relative to TMS used as internal standard and the coupling constants (*J*) are measured in Hz. The ESI-HRMS spectra of all the compounds were recorded on a JEOL JMS-AX505W high-resolution mass spectrometer in positive ion mode using the matrix HEDS (*bis*-hydroxyethylsulphide) doped with sodium acetate. Acetonitrile was used after distillation over freshly ignited potassium carbonate.

2'-Deoxy-1'-(5-cyanomethyl-3-*p*-methylphenyl)pyrazolyl-3',5'-di-*O*-toluoyl- $\beta$ -D-ribofuranose

(3a)

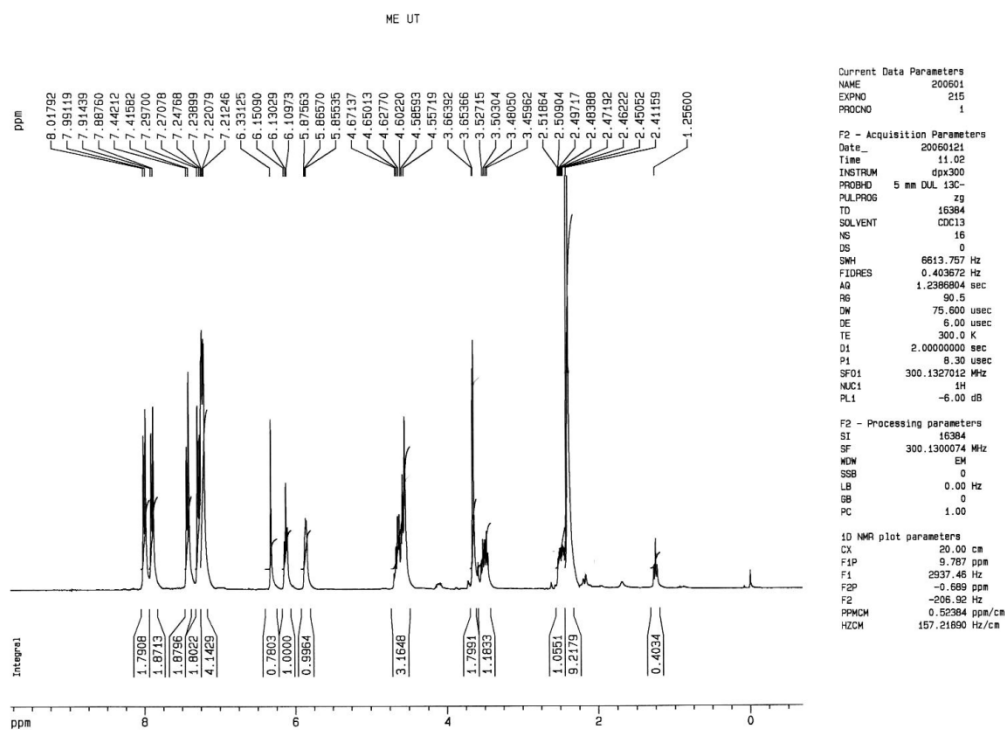

$^1\text{H}$  NMR spectrum (Bruker, 300MHz,  $\text{CDCl}_3$ ) of compound **3a**

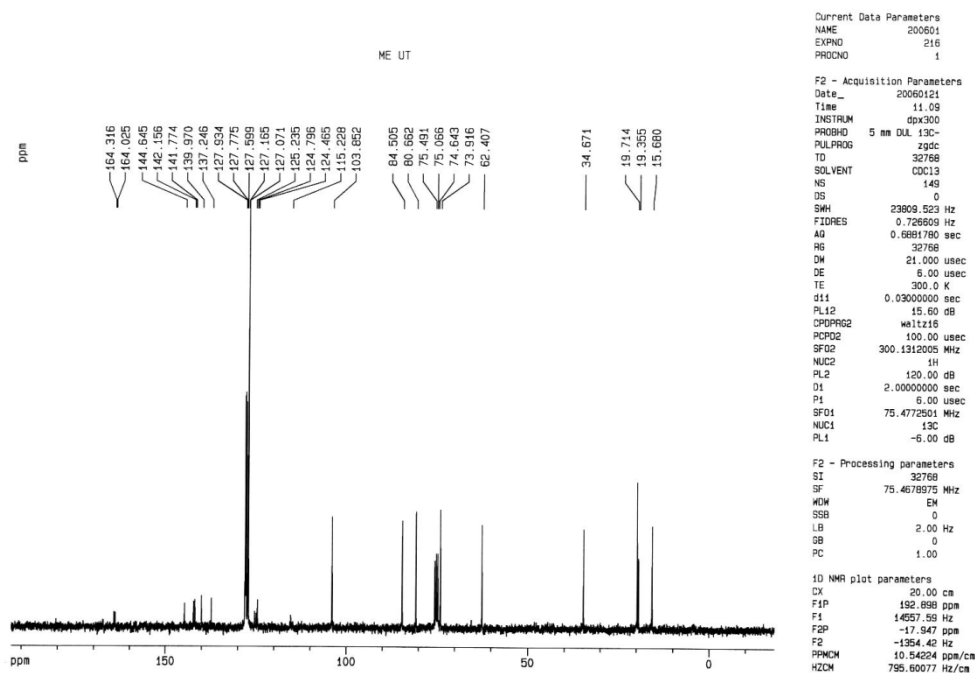

$^{13}\text{C}$  NMR spectrum (Bruker, 75.5MHz,  $\text{CDCl}_3$ ) of compound **3a**

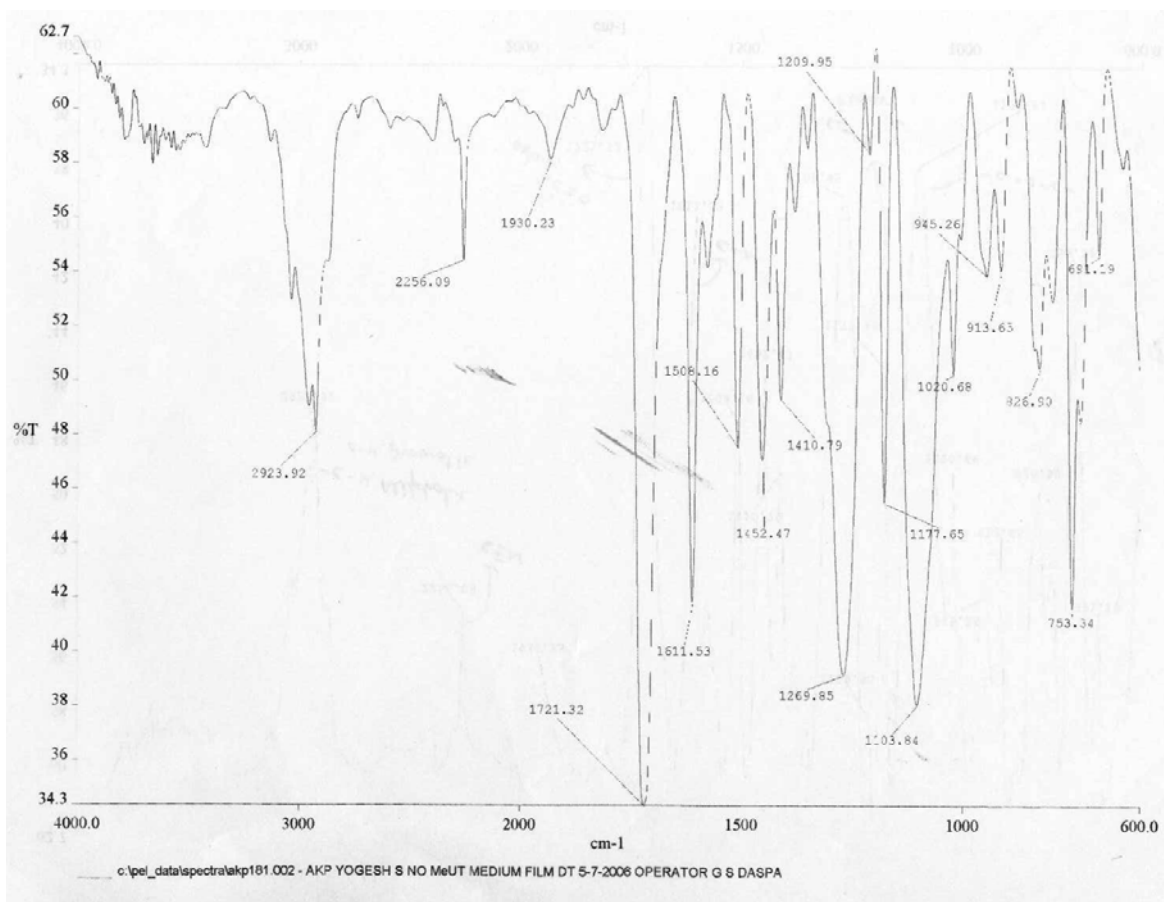

IR spectrum (Perkin-Elmer 2000 FT-IR spectrophotometer) of compound **3a**

2'-Deoxy-1'-(3-cyanomethyl-5-*p*-methoxyphenyl)pyrazolyl-3',5'-di-*O*-toluoyl- $\beta$ -D-ribo furanose  
(3b).

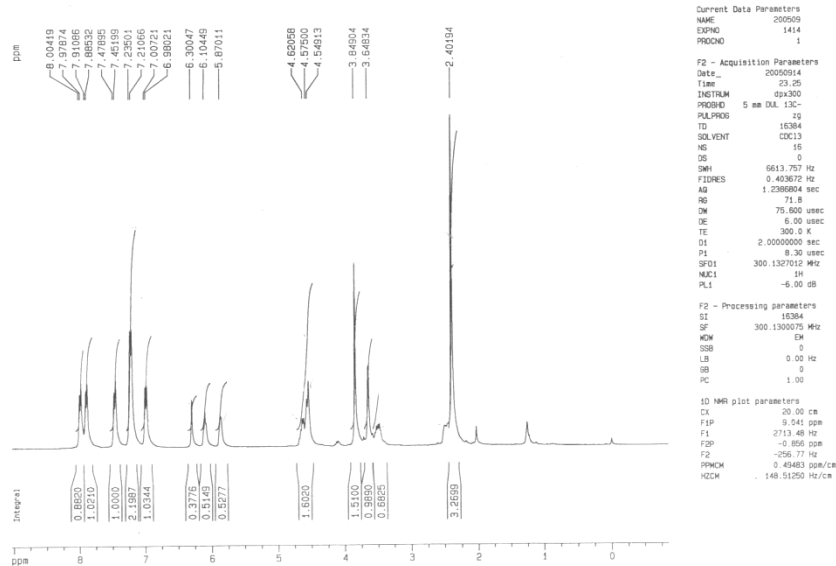

$^1\text{H}$  NMR spectrum (Bruker, 300MHz,  $\text{CDCl}_3$ ) of compound **3b**

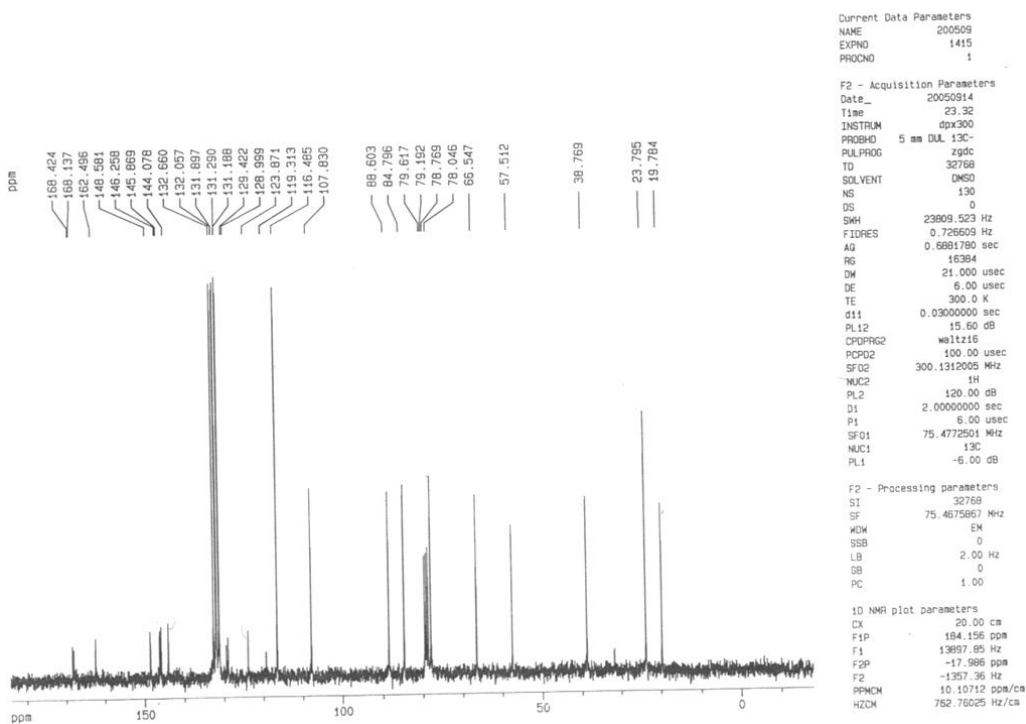

$^{13}\text{C}$  NMR spectrum (Bruker, 75.5MHz,  $\text{CDCl}_3$ ) of compound **3b**

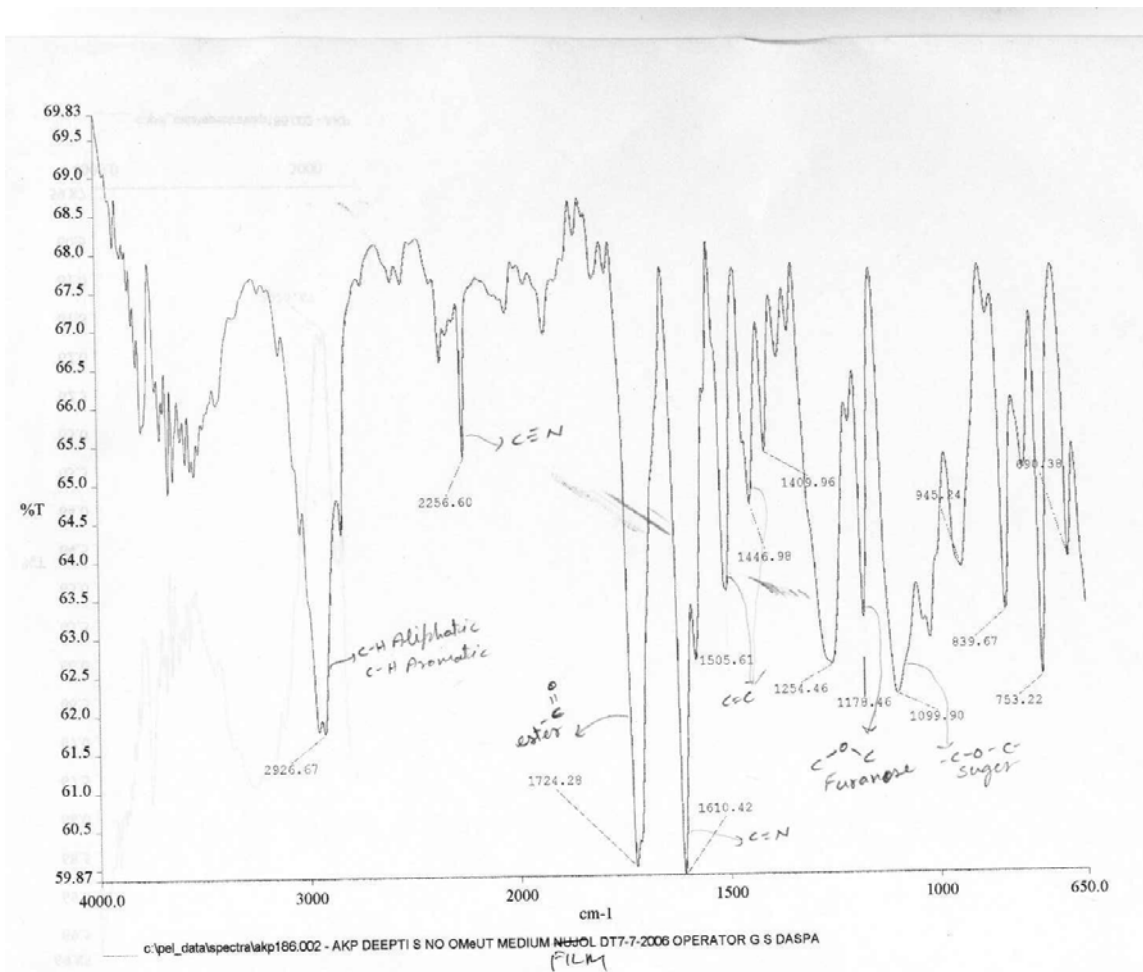

IR spectrum (Perkin-Elmer 2000 FT-IR spectrophotometer) of compound **3b**

2'-Deoxy-1'-(3-cyanomethyl-5-*p*-fluorophenyl)pyrazolyl-3',5'-di-*O*-toluoyl- $\beta$ -D-ribofuranose (3c).

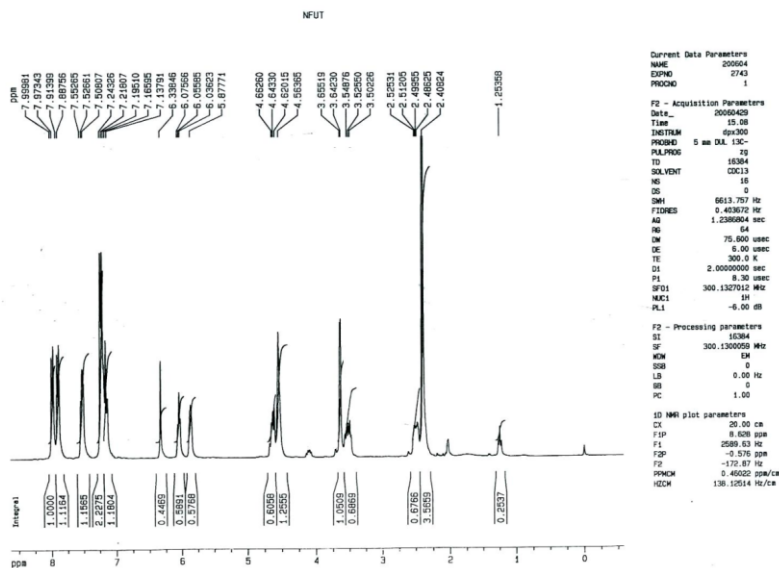

<sup>1</sup>H NMR spectrum (Bruker, 300MHz, CDCl<sub>3</sub>) of compound 3c

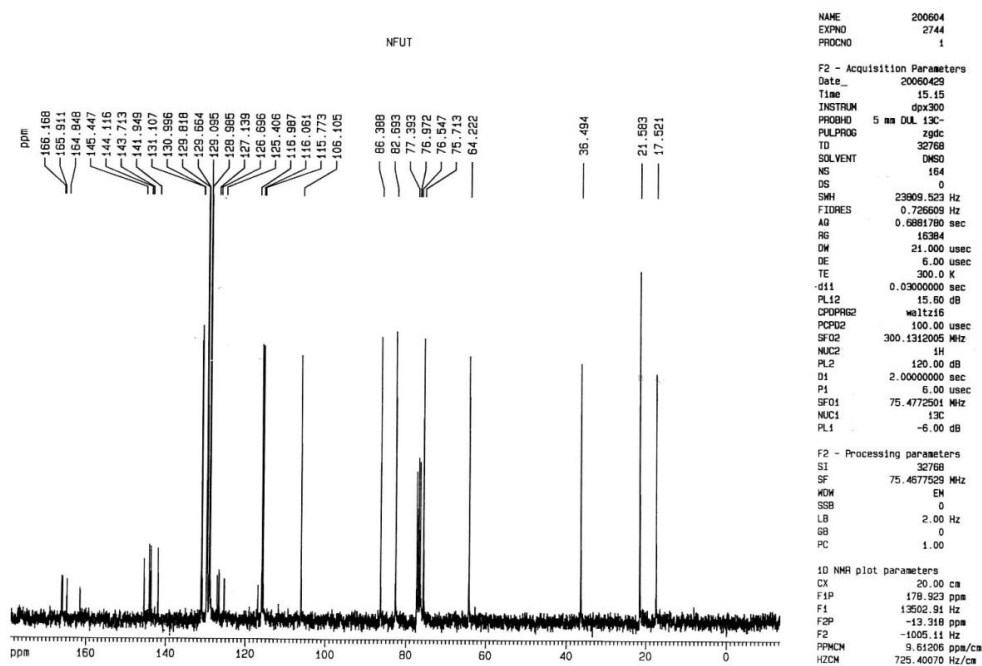

<sup>13</sup>C NMR spectrum (Bruker, 75.5MHz, CDCl<sub>3</sub>) of compound 3c

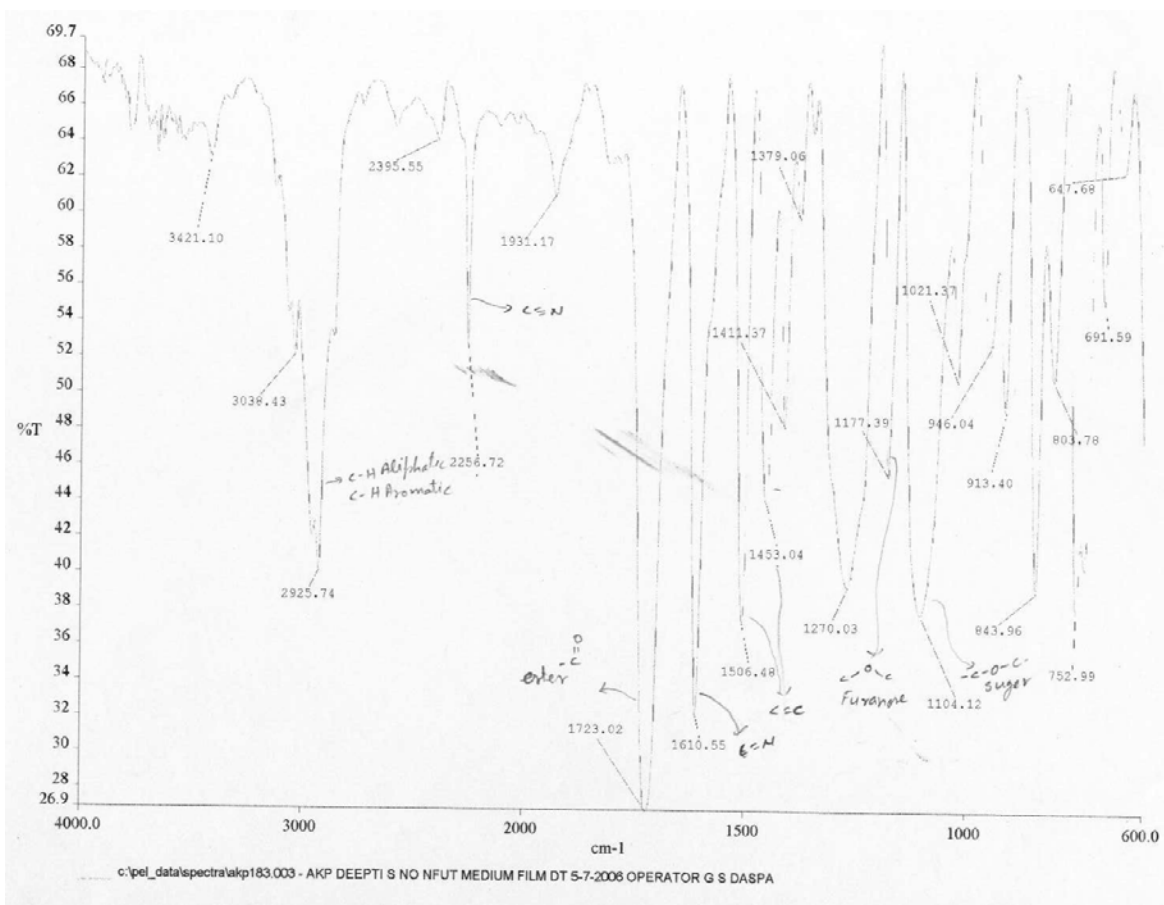

IR spectrum (Perkin-Elmer 2000 FT-IR spectrophotometer) of compound **3c**

2'-Deoxy-1'-(3-cyanomethyl-5-*p*-chlorophenyl)pyrazolyl-3',5'-di-*O*-toluoyl- $\beta$ -D-ribofuranose  
(3d)

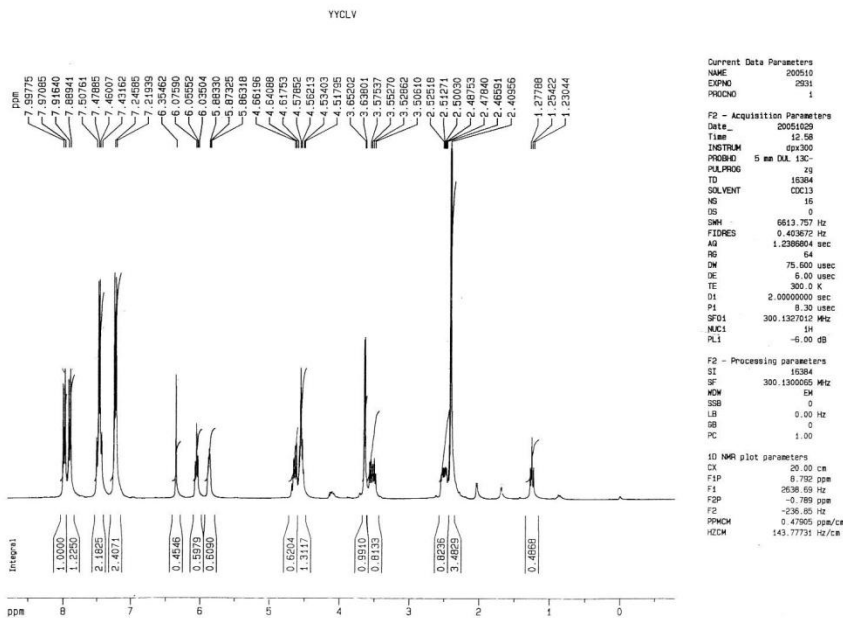

$^1\text{H}$  NMR spectrum (Bruker, 300MHz,  $\text{CDCl}_3$ ) of compound 3d

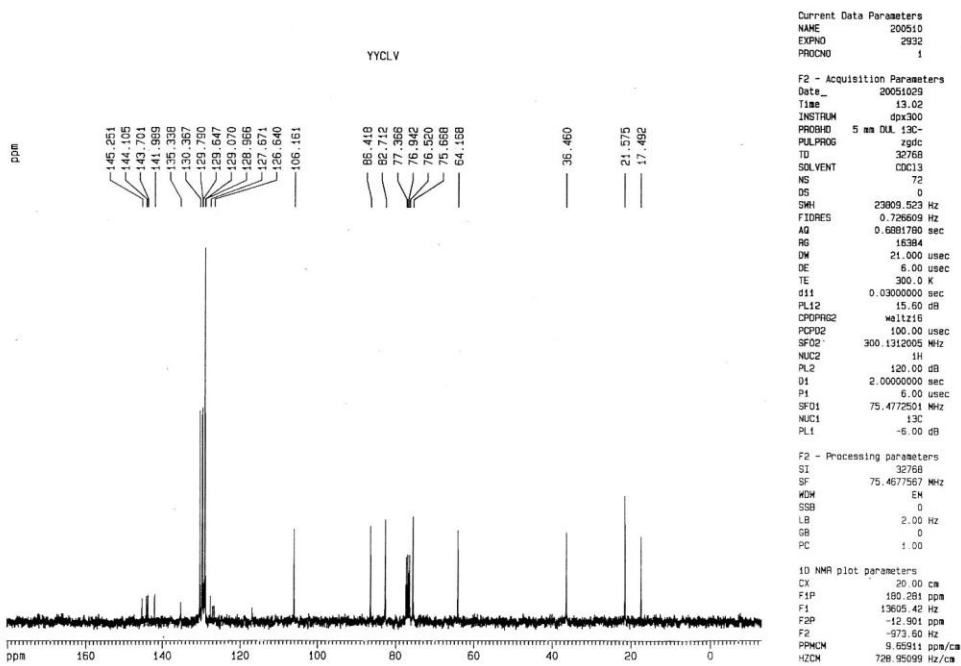

$^{13}\text{C}$  NMR spectrum (Bruker, 75.5MHz,  $\text{CDCl}_3$ ) of compound 3d



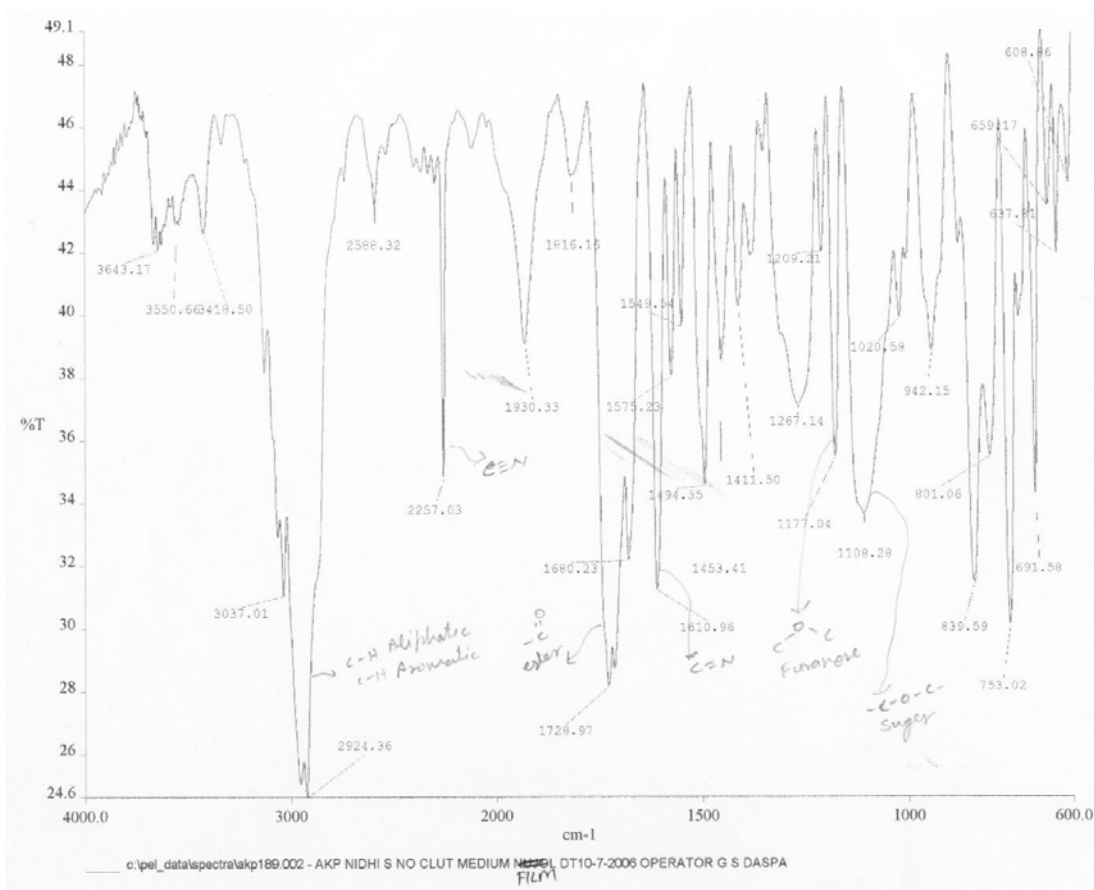

IR spectrum (Perkin-Elmer 2000 FT-IR spectrophotometer) of compound **3d**

**2'-Deoxy-1'-(3-cyanomethyl-5-*p*-bromophenyl)pyrazolyl-3',5'-di-*O*-toluoyl- $\beta$ -D-ribofuranose (3e)**

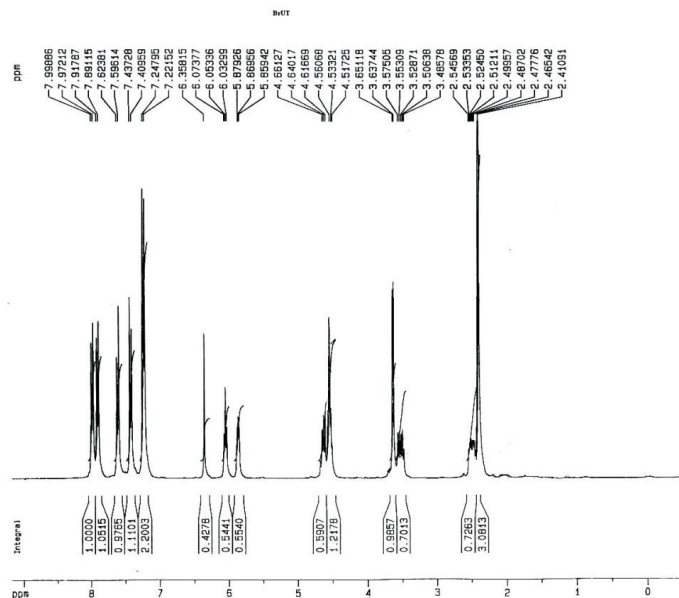

$^1\text{H}$  NMR spectrum (Bruker, 300MHz,  $\text{CDCl}_3$ ) of compound **3e**

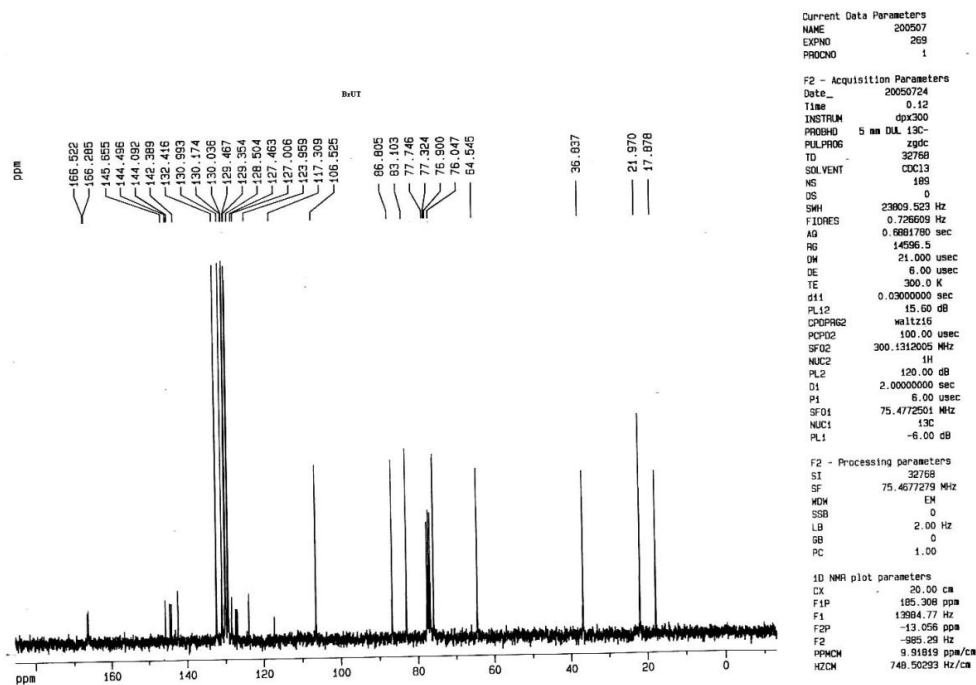

$^{13}\text{C}$  NMR spectrum (Bruker, 75.5MHz,  $\text{CDCl}_3$ ) of compound **3e**

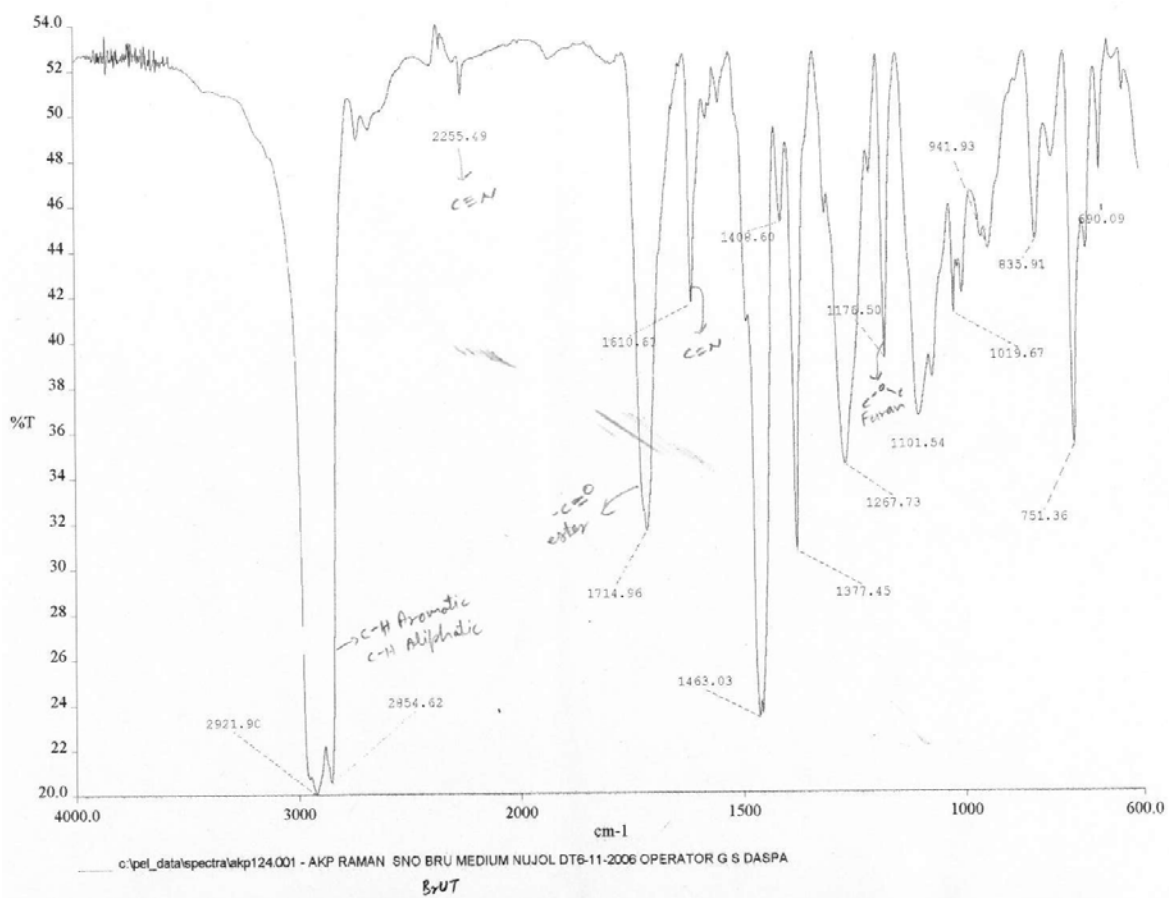

IR spectrum (Perkin-Elmer 2000 FT-IR spectrophotometer) of compound **3e**

**2'-Deoxy-1'-(5-cyanomethyl-3-*p*-methylphenyl)pyrazolyl-3',5'-di-*O*-toluoyl-β-D-ribofuranose (4a)**

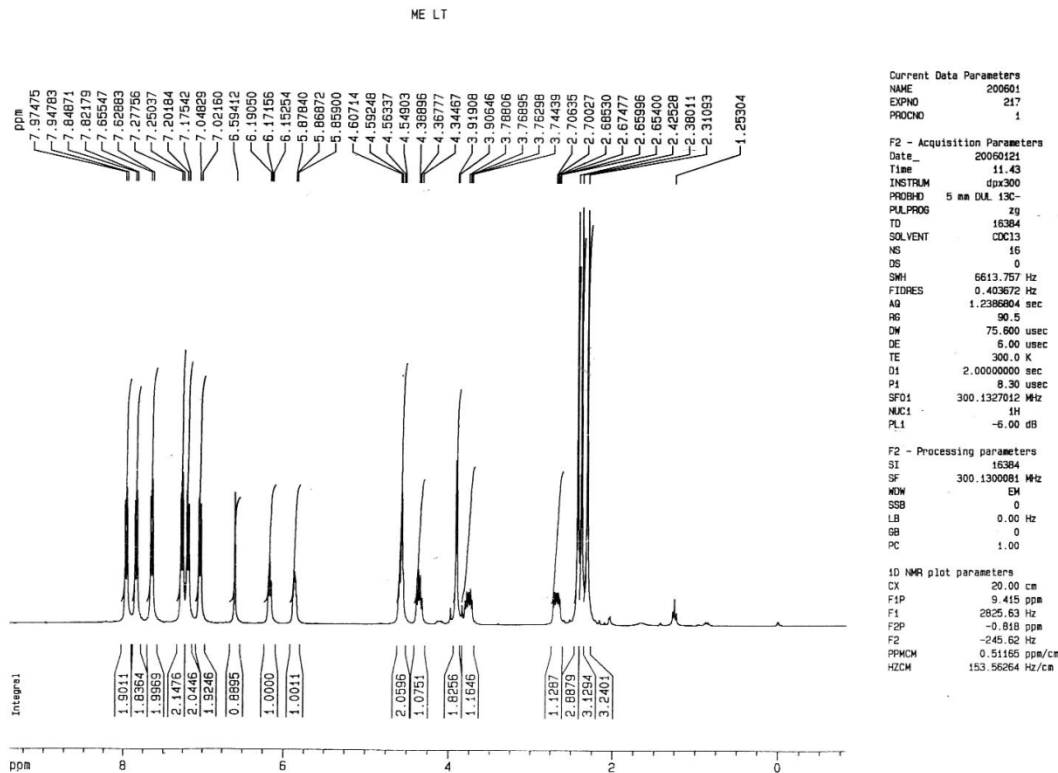

<sup>1</sup>H NMR spectrum (Bruker, 300MHz, CDCl<sub>3</sub>) of compound **4a**

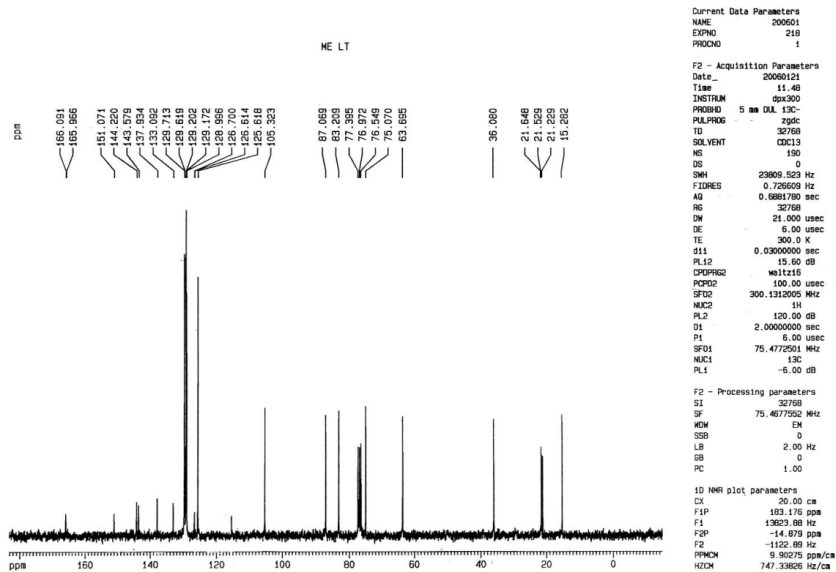

<sup>13</sup>C NMR spectrum (Bruker, 75.5MHz, CDCl<sub>3</sub>) of compound **4a**

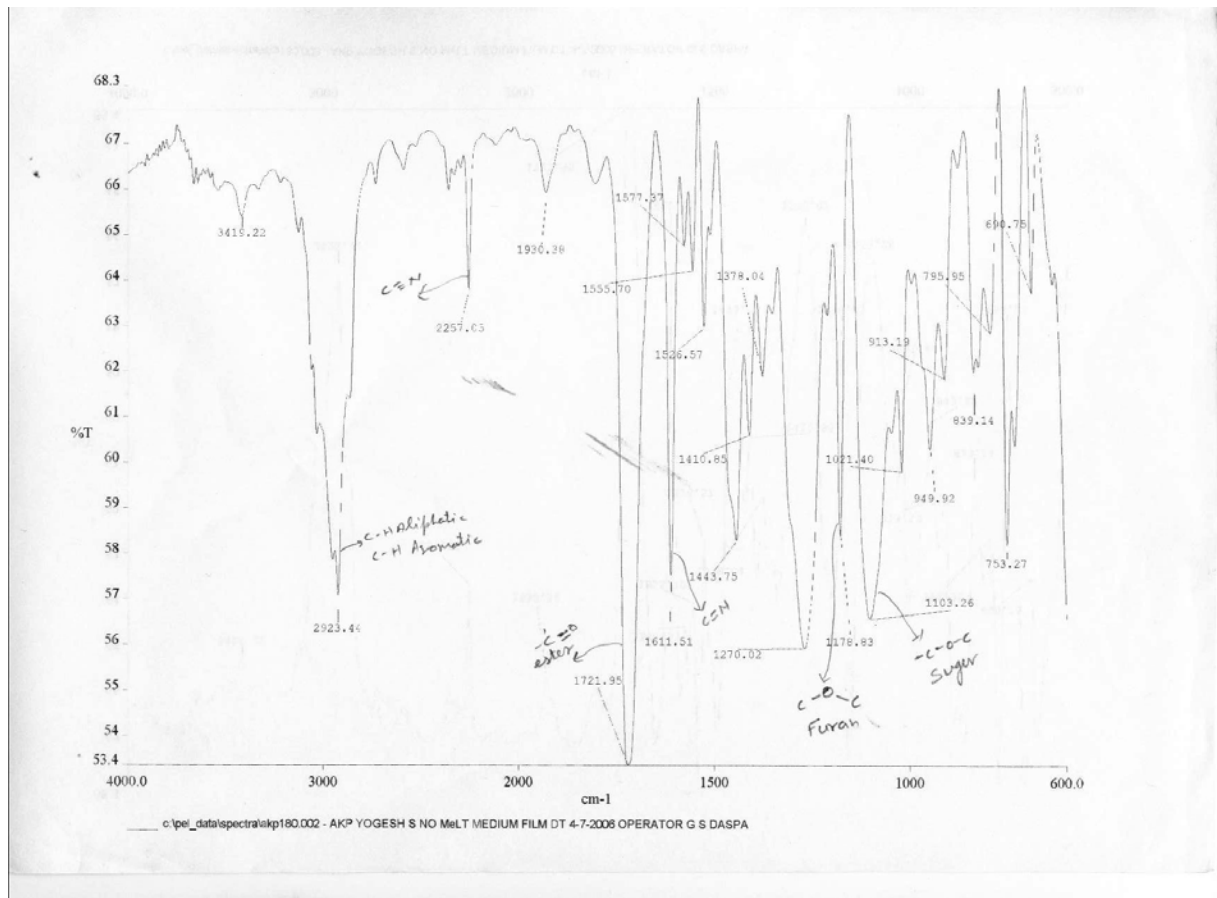

IR spectrum (Perkin-Elmer 2000 FT-IR spectrophotometer) of compound **4a**

**2'-deoxy-1'-(5-cyanomethyl-3-*p*-methoxyphenyl)pyrazolyl-3',5'-di-*O*-toluoyl- $\beta$ -D-ribofuranose (4b).**

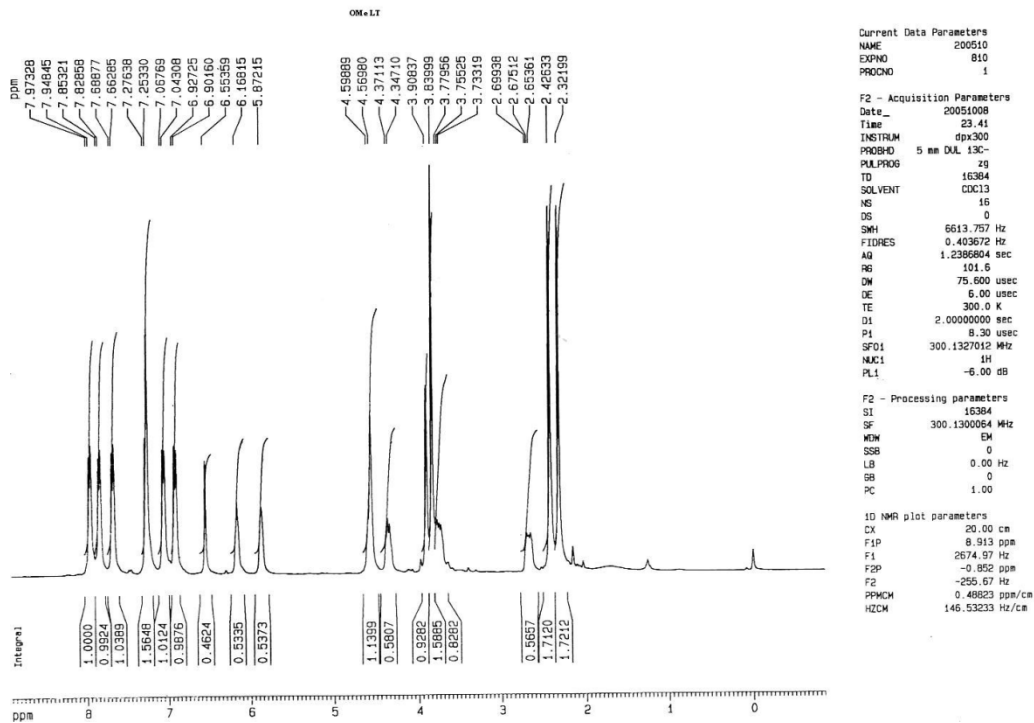

<sup>1</sup>H NMR spectrum (Bruker, 300MHz, CDCl<sub>3</sub>) of compound **4b**

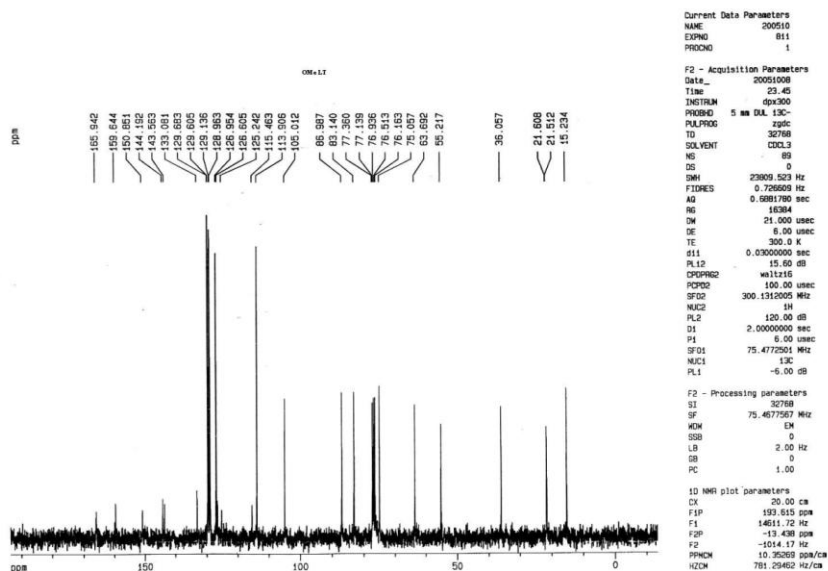

<sup>13</sup>C NMR spectrum (Bruker, 75.5MHz, CDCl<sub>3</sub>) of compound **4b**

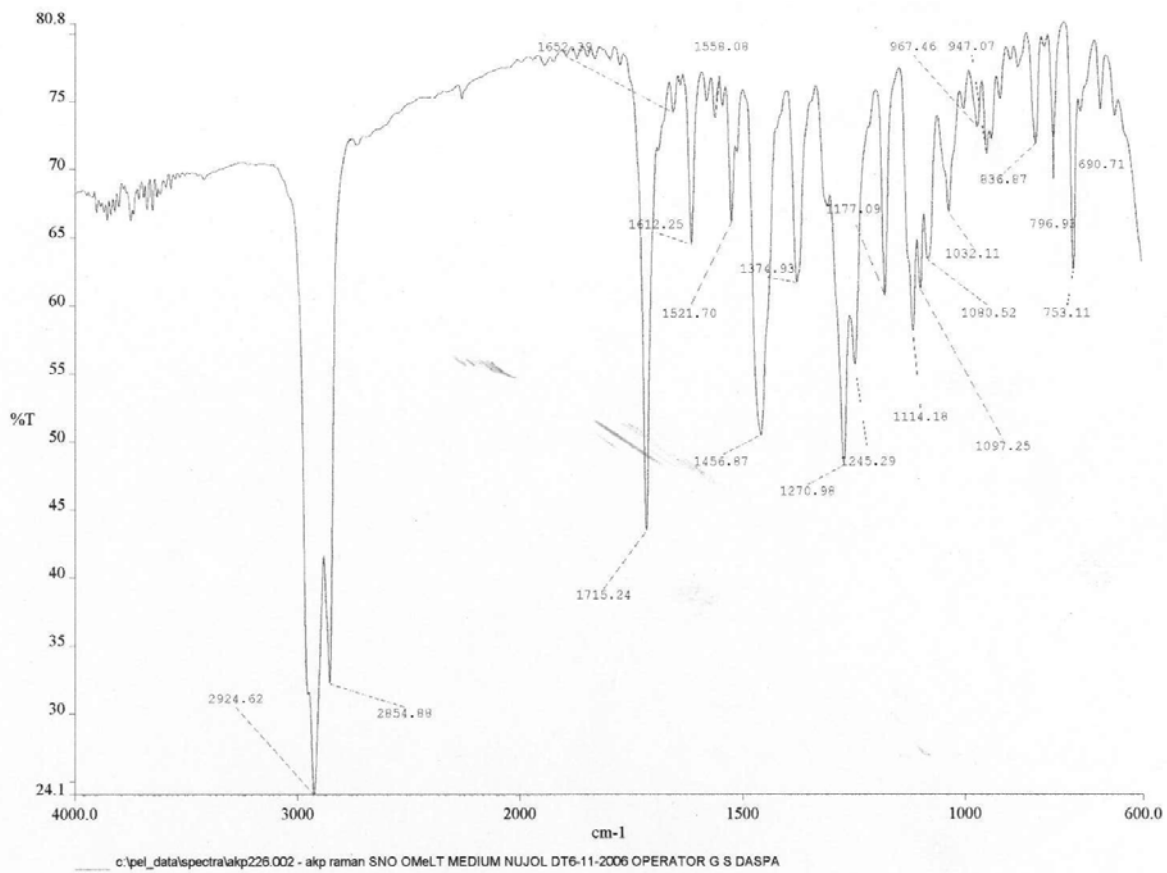

IR spectrum (Perkin-Elmer 2000 FT-IR spectrophotometer) of compound **4b**

2'-Deoxy-1'-(5-cyanomethyl-3-*p*-fluorophenyl)pyrazolyl-3',5'-di-*O*-toluoyl- $\beta$ -D-ribofuranose  
(4c).

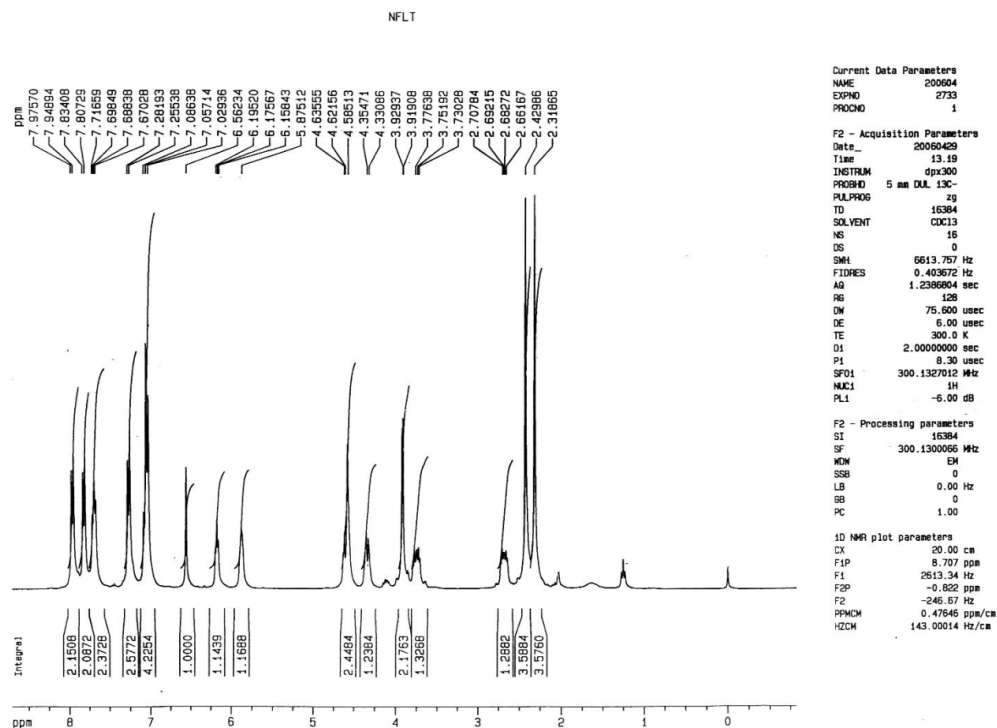

$^1\text{H}$  NMR spectrum (Bruker, 300MHz,  $\text{CDCl}_3$ ) of compound 4c

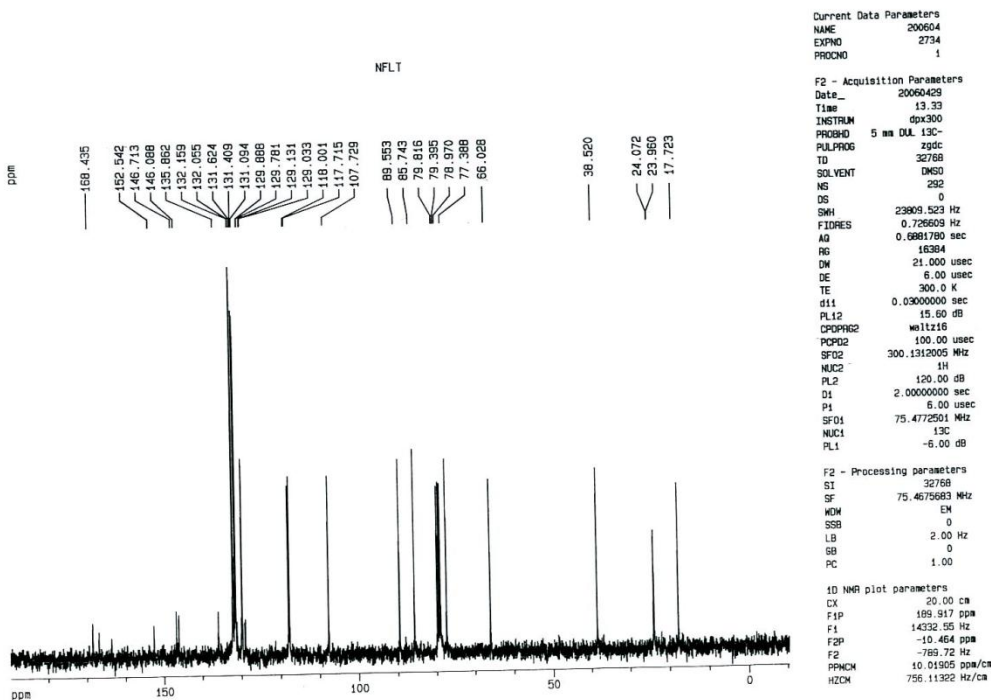

$^{13}\text{C}$  NMR spectrum (Bruker, 75.5MHz,  $\text{CDCl}_3$ ) of compound 4c



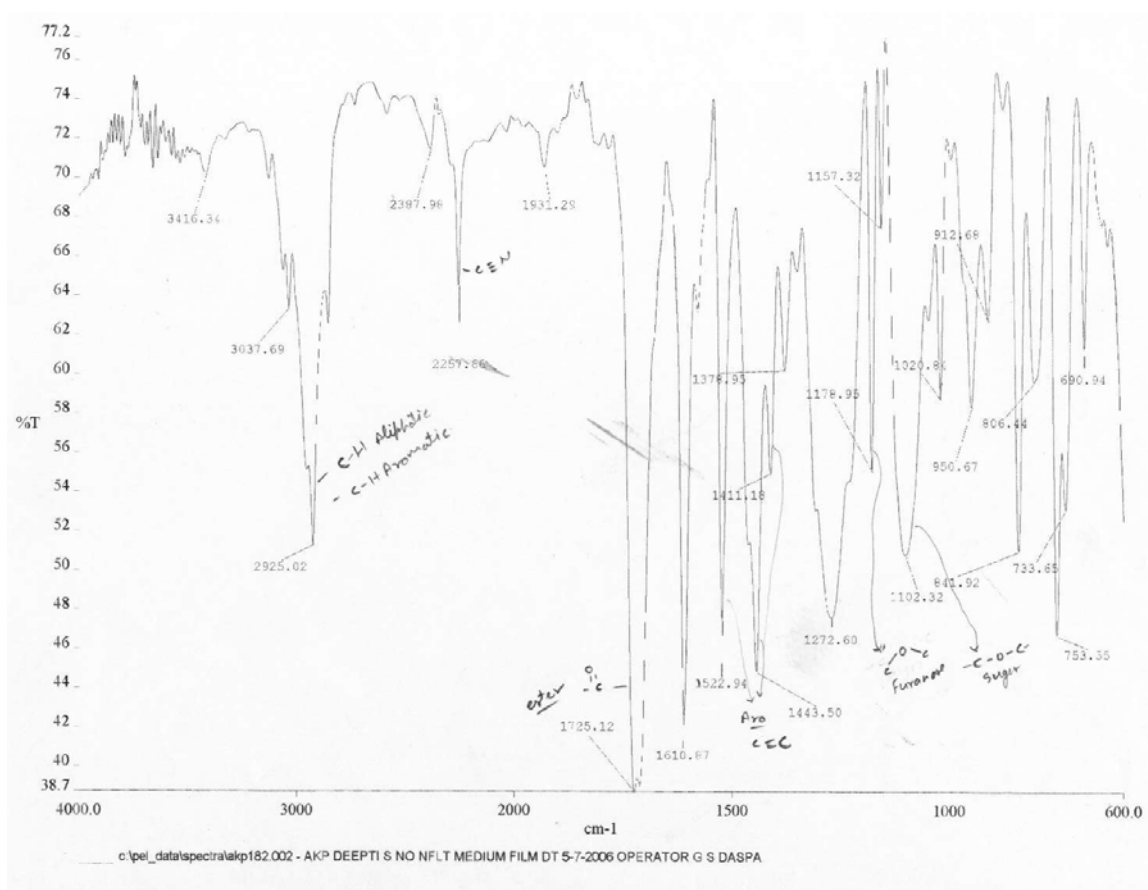

IR spectrum (Perkin-Elmer 2000 FT-IR spectrophotometer) of compound **4c**

**2'-Deoxy-1'-(5-cyanomethyl-3-*p*-chlorophenyl)pyrazolyl-3',5'-di-*O*-toluoyl- $\beta$ -D-ribofuranose (4d).**

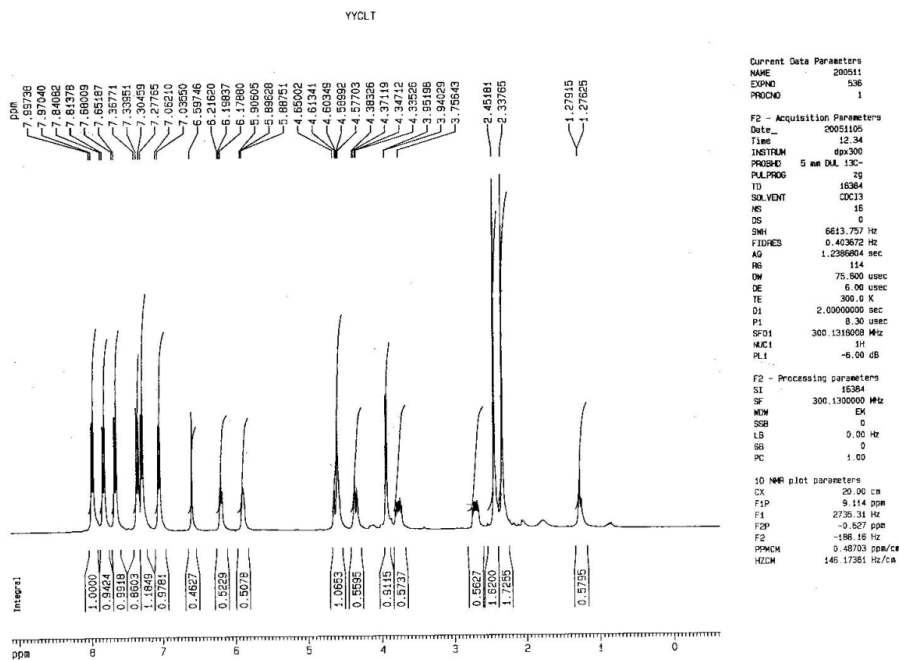

<sup>1</sup>H NMR spectrum (Bruker, 300MHz, CDCl<sub>3</sub>) of compound 4d

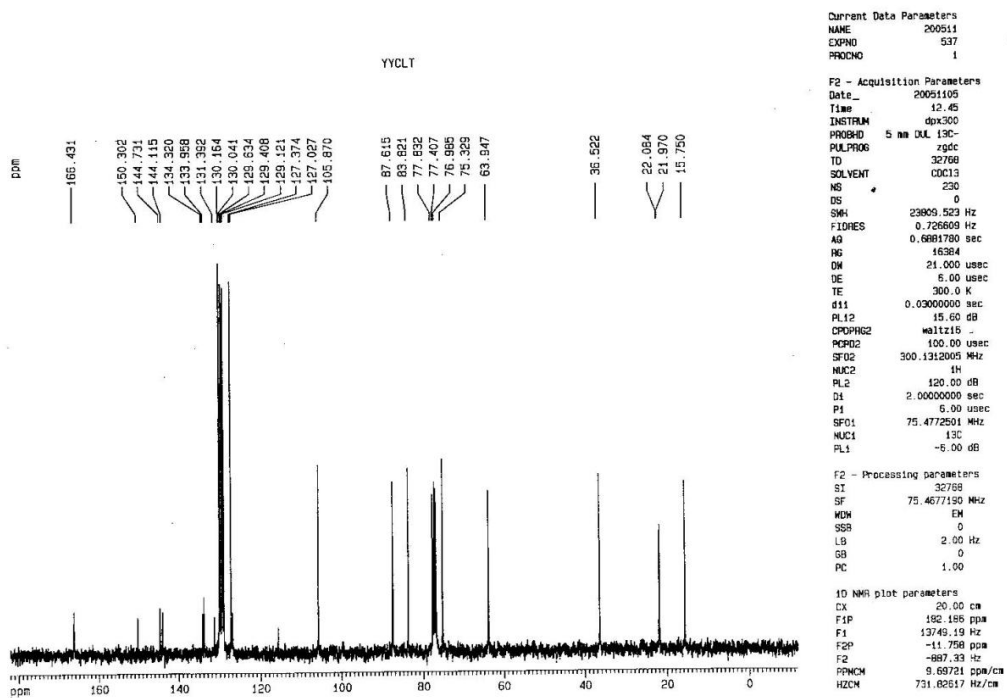

<sup>13</sup>C NMR spectrum (Bruker, 75.5MHz, CDCl<sub>3</sub>) of compound 4d

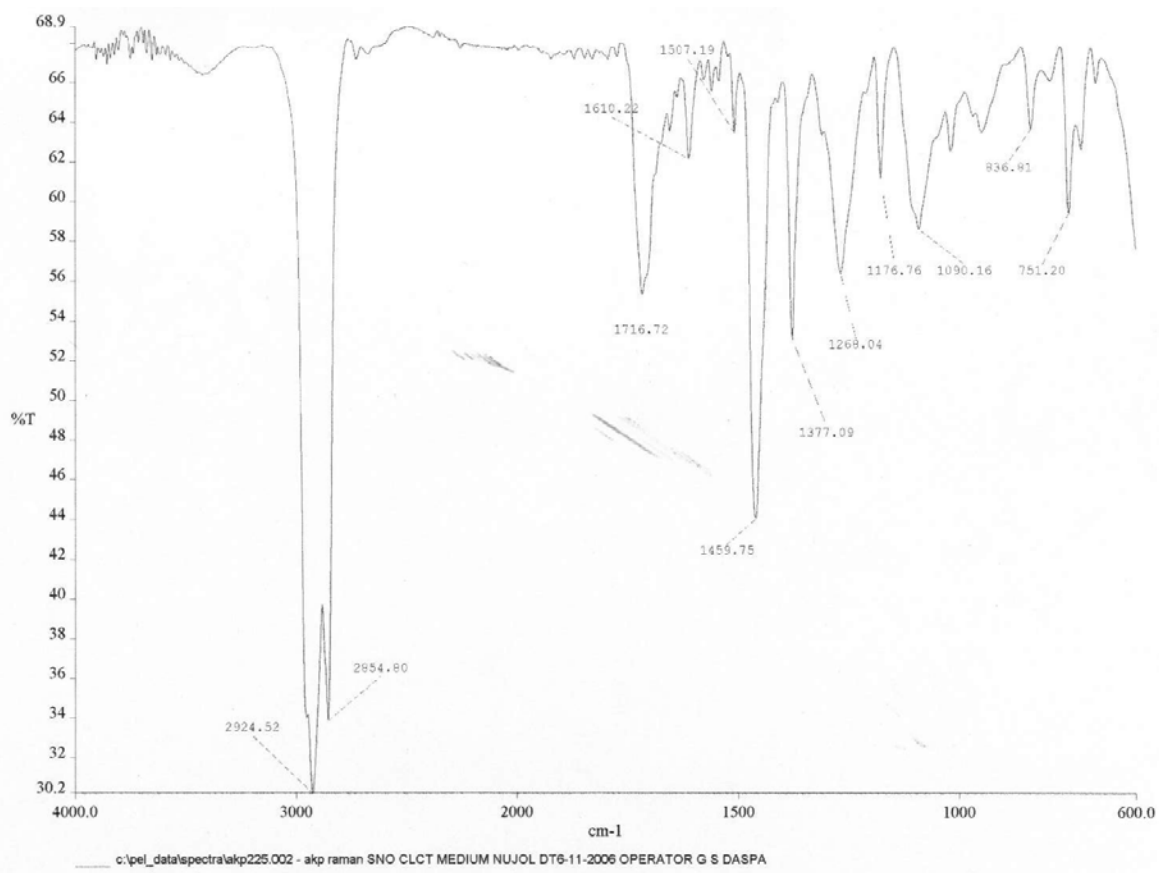

IR spectrum (Perkin-Elmer 2000 FT-IR spectrophotometer) of compound **4d**

**2'-Deoxy-1'-(5-cyanomethyl-3-*p*-bromophenyl)pyrazolyl-3',5'-di-*O*-toluoyl- $\beta$ -D-ribofuranose (4e)**

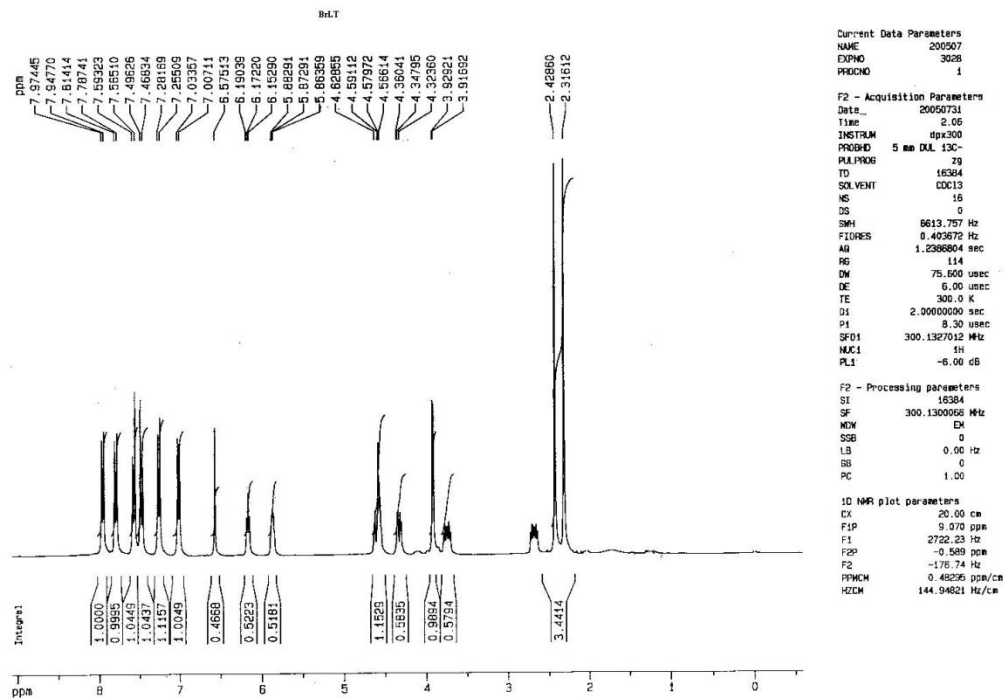

<sup>1</sup>H NMR spectrum (Bruker, 300MHz, CDCl<sub>3</sub>) of compound 4e

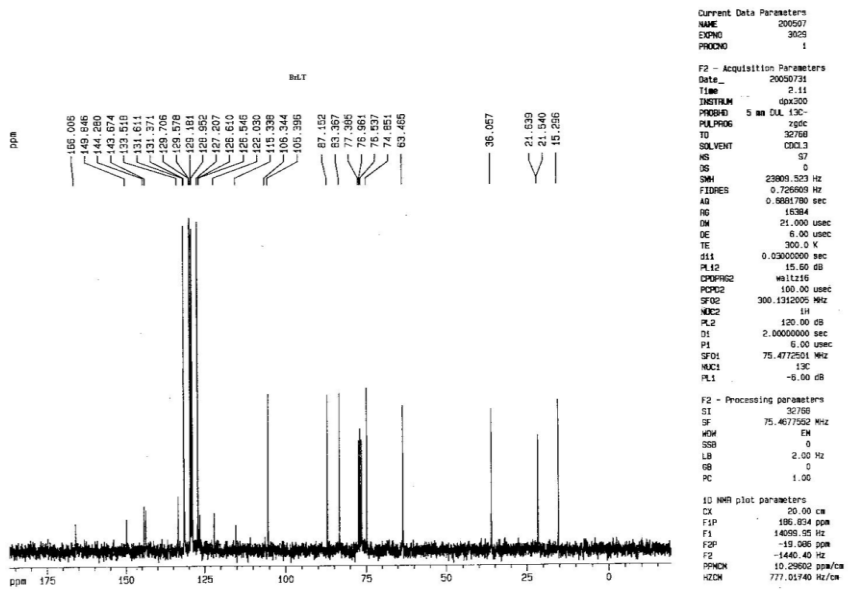

<sup>13</sup>C NMR spectrum (Bruker, 75.5MHz, CDCl<sub>3</sub>) of compound 4e

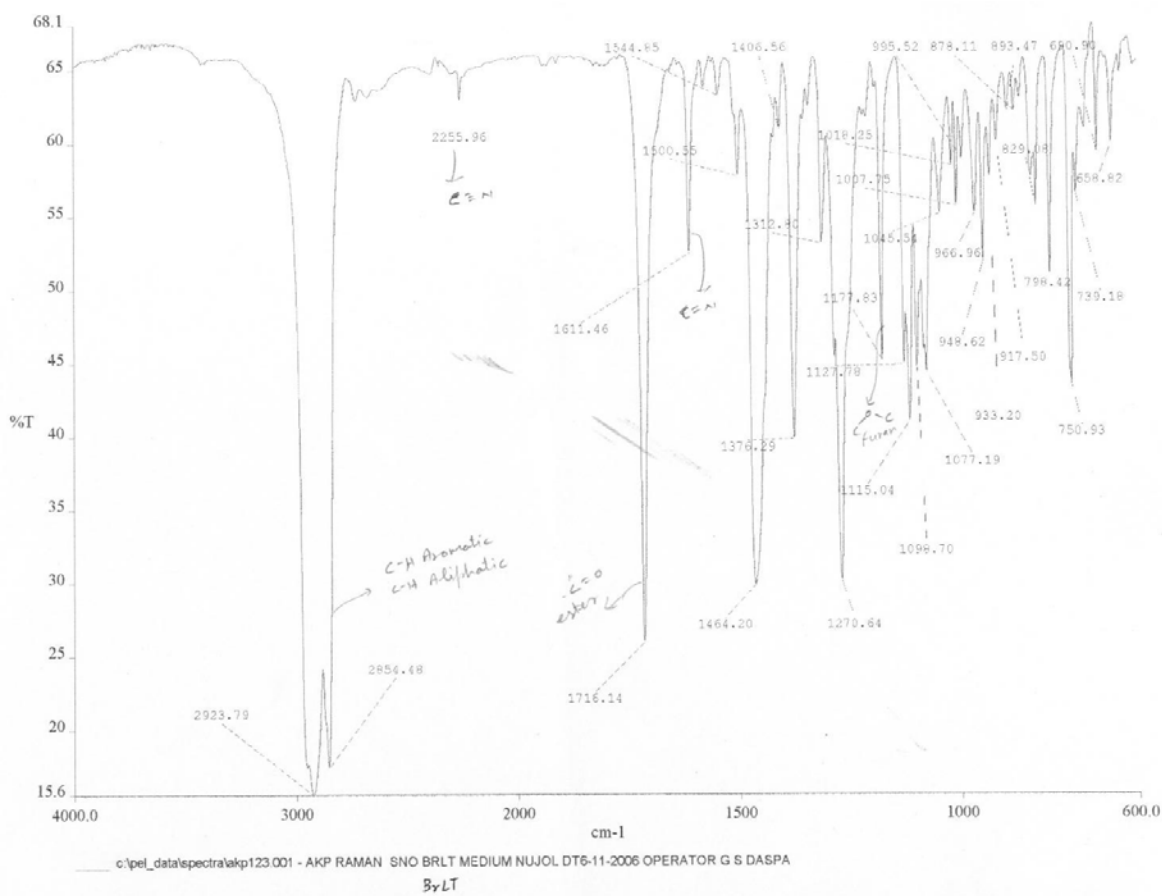

IR spectrum (Perkin-Elmer 2000 FT-IR spectrophotometer) of compound **4e**

2'-Deoxy-1'-(3-cyanomethyl-5-p-methylphenyl)pyrazolyl-β-D-ribofuranose (5a).

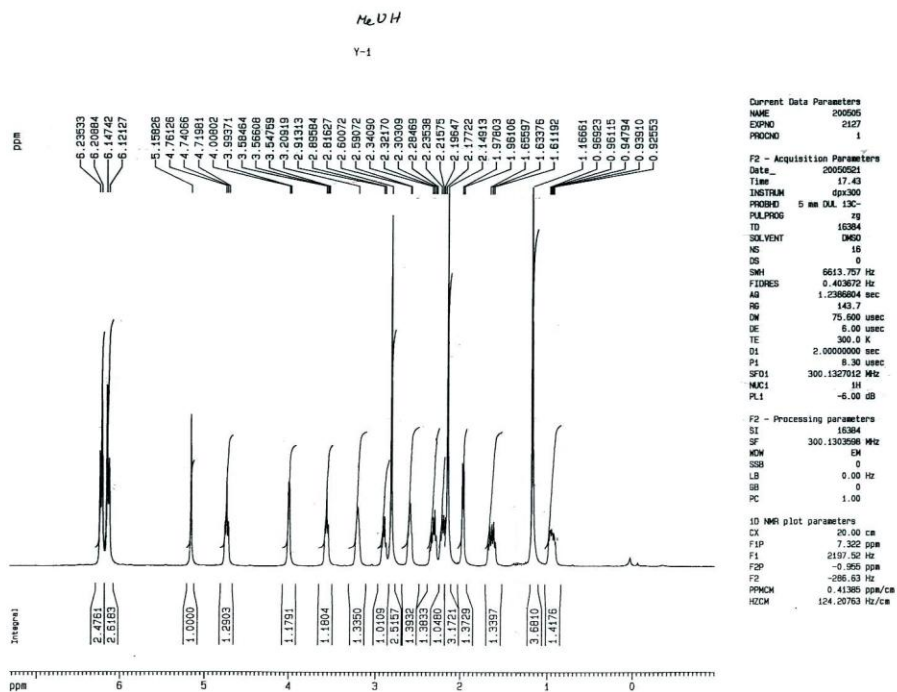

<sup>1</sup>H NMR spectrum (Bruker, 300MHz, DMSO) of compound 5a

**2'-Deoxy-1'-(3-cyanomethyl-5-p-methoxyphenyl)pyrazolyl-β-D-ribofuranose (5b).**

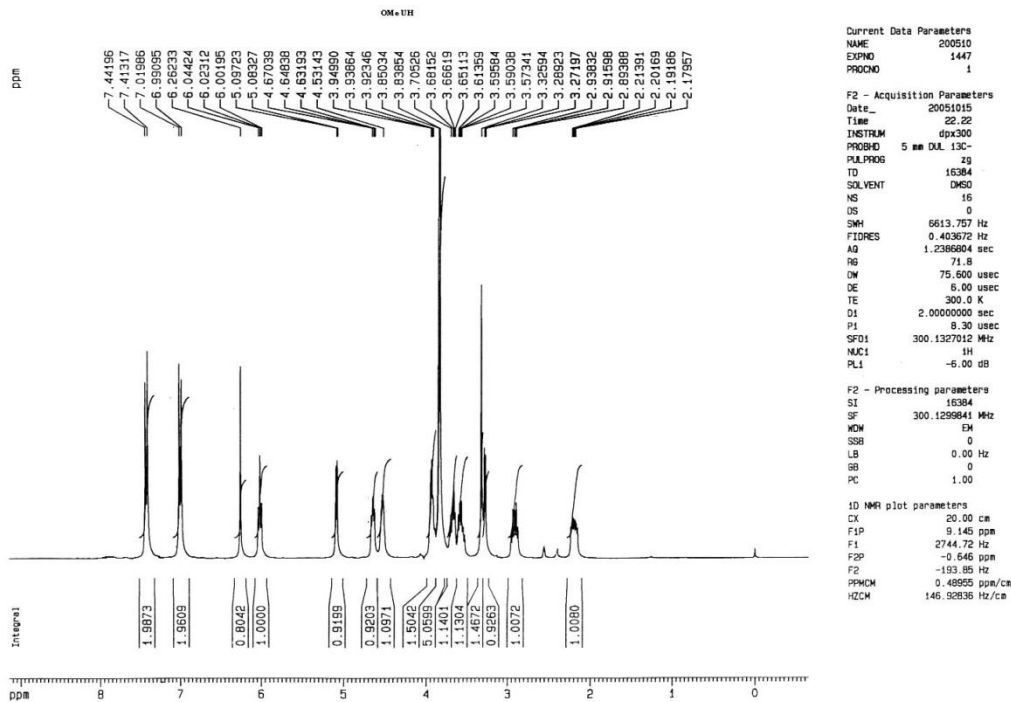

<sup>1</sup>H NMR spectrum (Bruker, 300MHz, mixture of CDCl<sub>3</sub> & DMSO) of compound **5b**

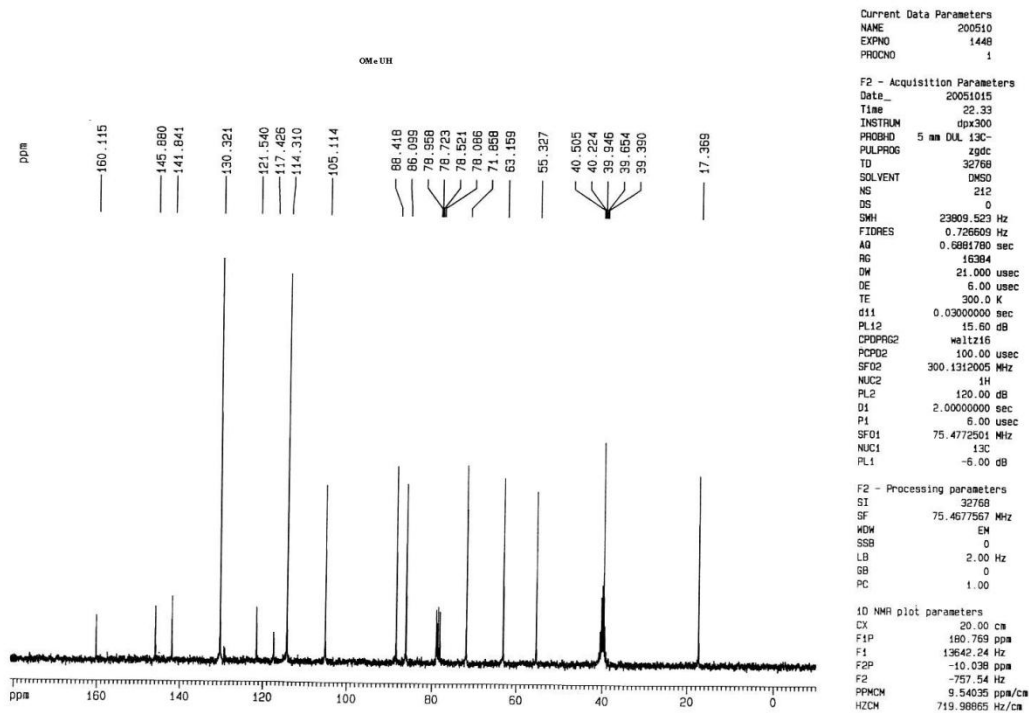

<sup>13</sup>C NMR spectrum (Bruker, 75.5MHz, mixture of CDCl<sub>3</sub> & DMSO) of compound **5b**

**2'-Deoxy-1'-(3-cyanomethyl-5-p-fluorophenyl)pyrazolyl-β-D-ribofuranose (5c).**

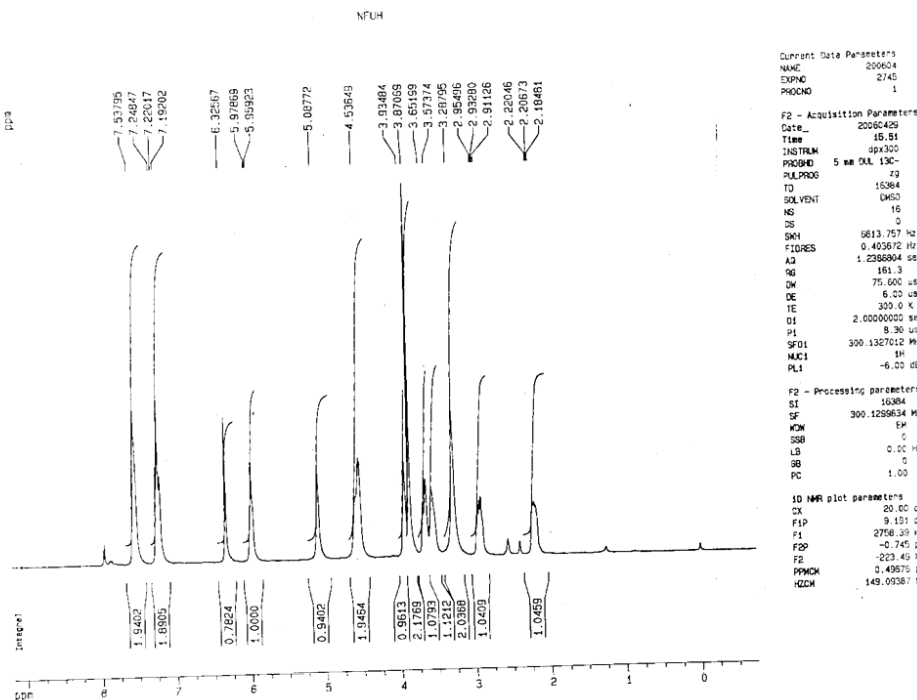

<sup>1</sup>H NMR spectrum (Bruker, 300MHz, mixture of CDCl<sub>3</sub> & DMSO) of compound 5c

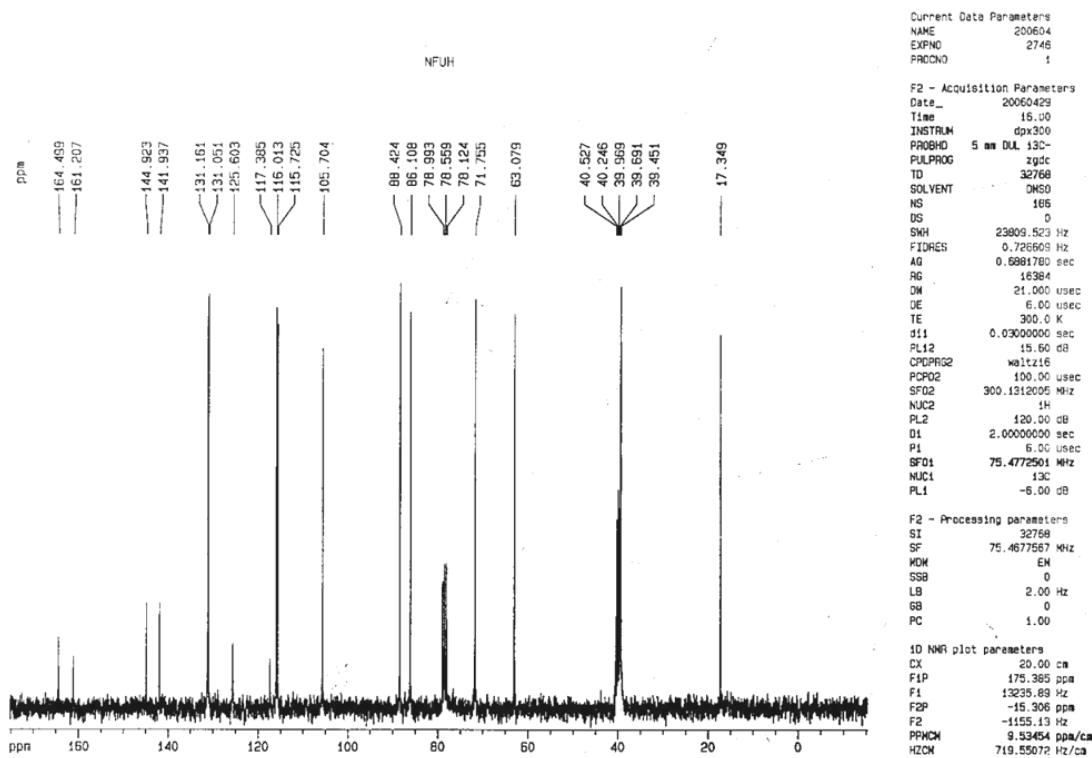

<sup>13</sup>C NMR spectrum (Bruker, 75.5MHz, mixture of CDCl<sub>3</sub> & DMSO) of compound 5c



**2'-Deoxy-1'-(3-cyanomethyl-5-p-chlorophenyl)pyrazolyl-β-D-ribofuranose (5d)**

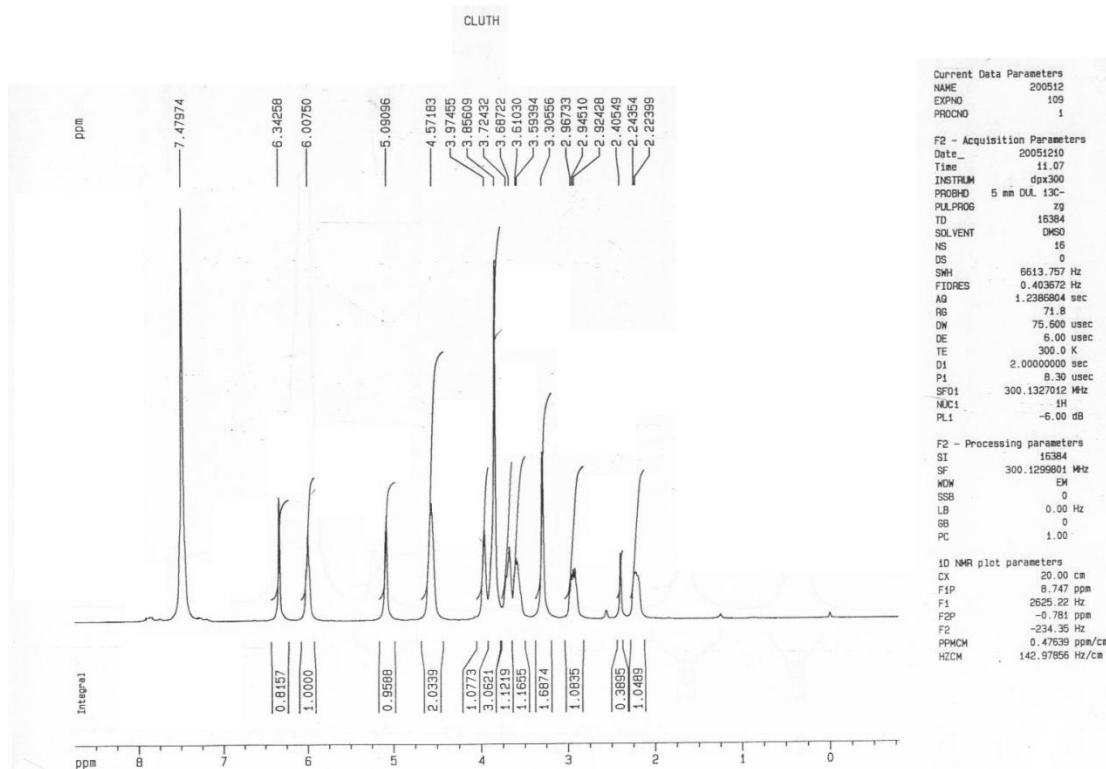

<sup>1</sup>H NMR spectrum (Bruker, 300MHz, mixture of CDCl<sub>3</sub> & DMSO) of compound **5d**

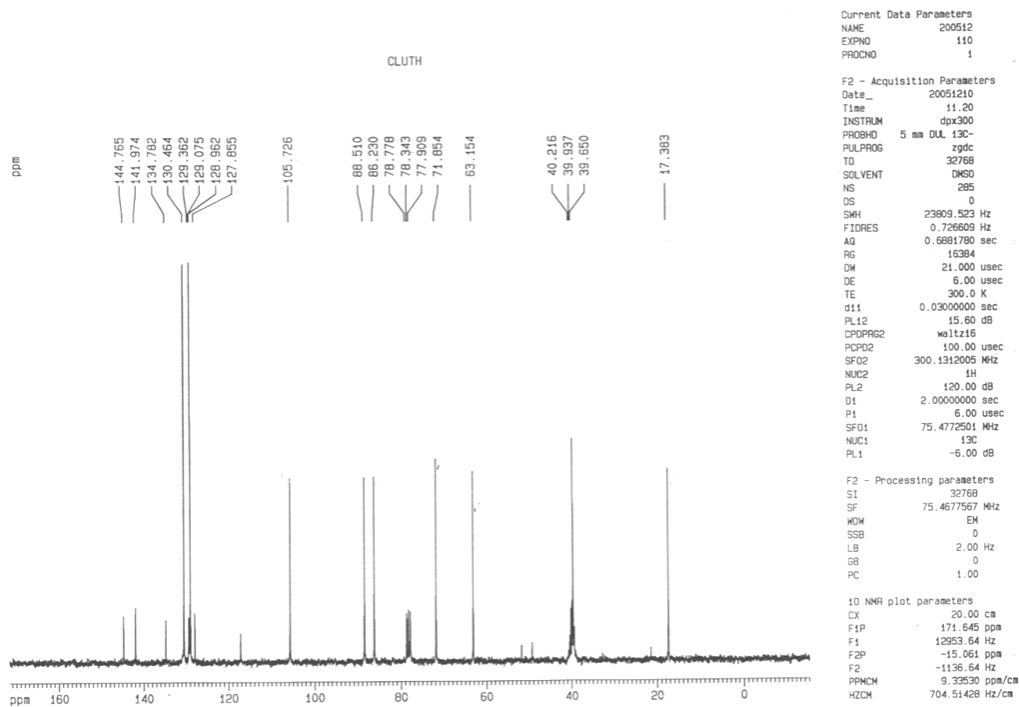

<sup>13</sup>C NMR spectrum (Bruker, 75.5MHz, mixture of CDCl<sub>3</sub> & DMSO) of compound **5d**

2'-Deoxy-1'-(3-cyanomethyl-5-p-bromophenyl)pyrazolyl-β-D-ribofuranose (5e).

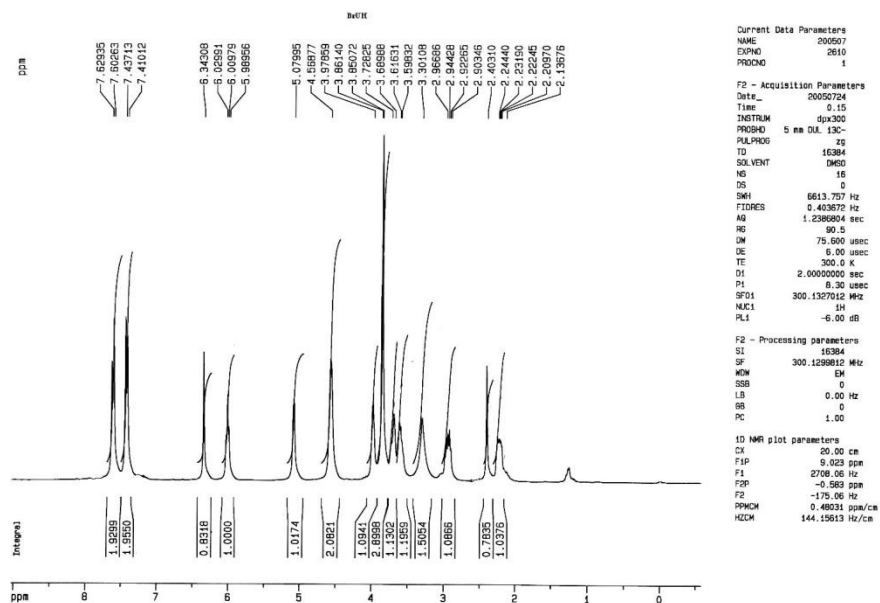

<sup>1</sup>H NMR spectrum (Bruker, 300MHz, mixture of CDCl<sub>3</sub> & DMSO) of compound 5e

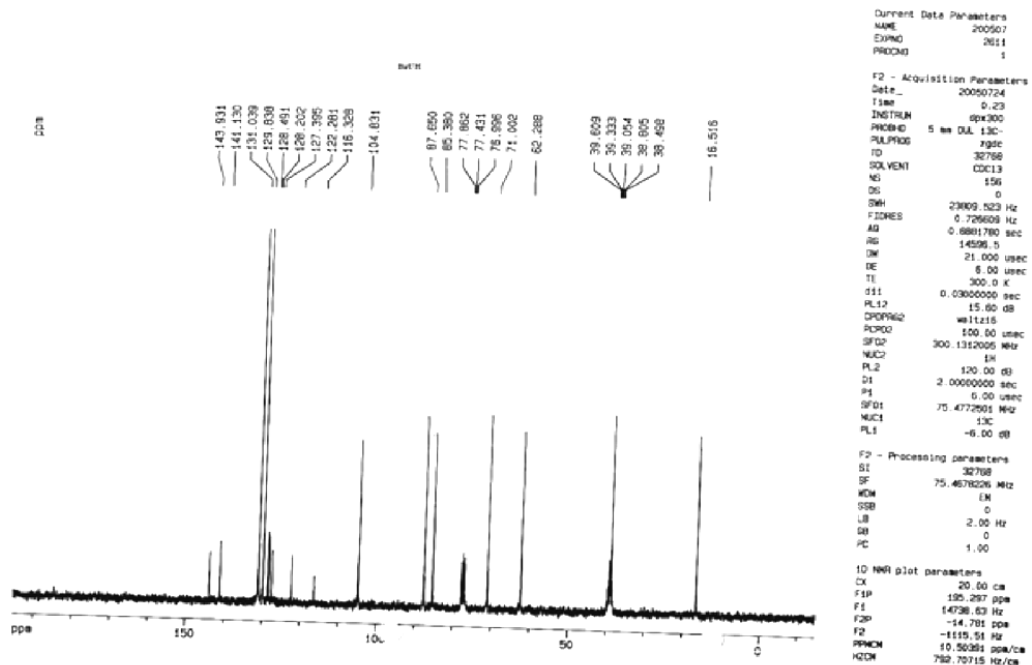

<sup>13</sup>C NMR spectrum (Bruker, 75.5MHz, mixture of CDCl<sub>3</sub> & DMSO) of compound 5d

2'-Deoxy-1'-(5-cyanomethyl-3-*p*-methylphenyl)pyrazolyl- $\beta$ -D-ribofuranose (**6a**)

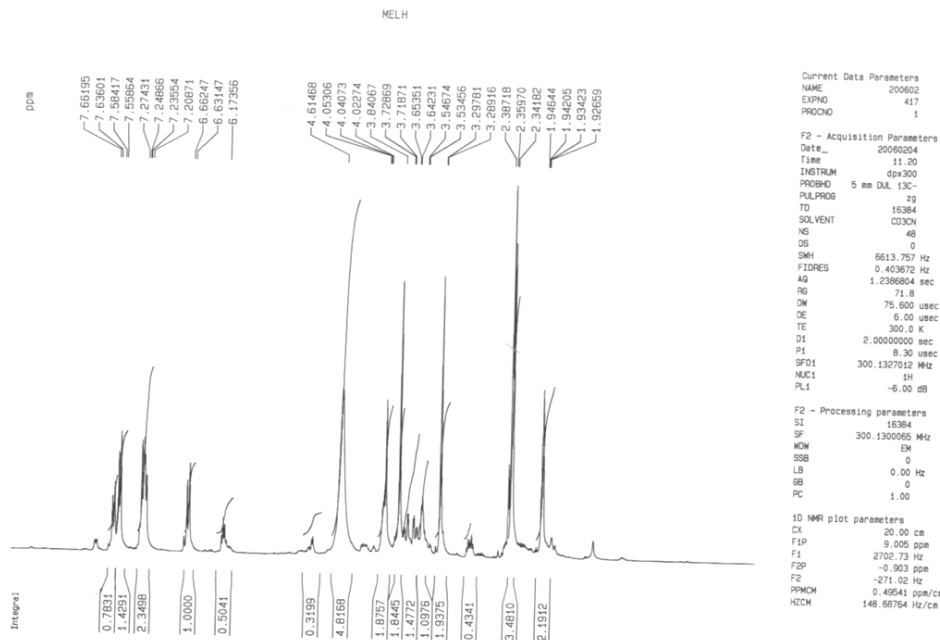

$^1\text{H}$  NMR spectrum (Bruker, 300MHz, mixture of  $\text{CD}_3\text{CN}$ ) of compound **6a**

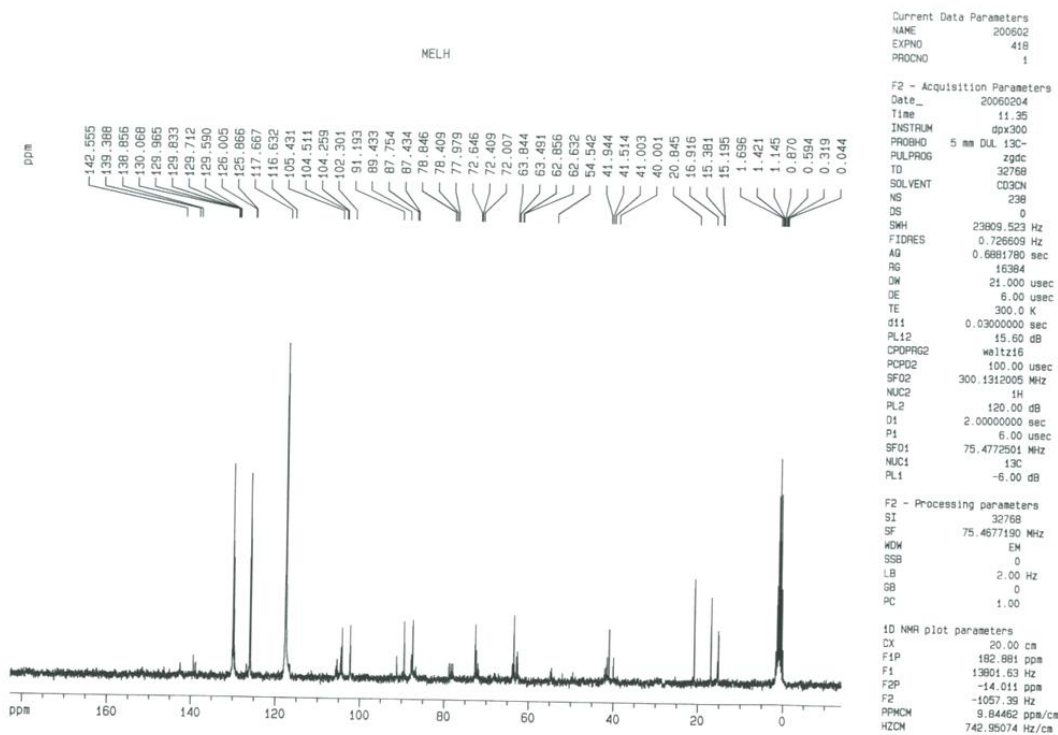

$^{13}\text{C}$  NMR spectrum (Bruker, 75.5MHz, mixture of  $\text{CD}_3\text{CN}$ ) of compound **6a**

## 2'-Deoxy-1'-(3-cyanomethyl-5-*p*-methoxyphenyl)pyrazolyl- $\beta$ -D-ribofuranose (**6b**)

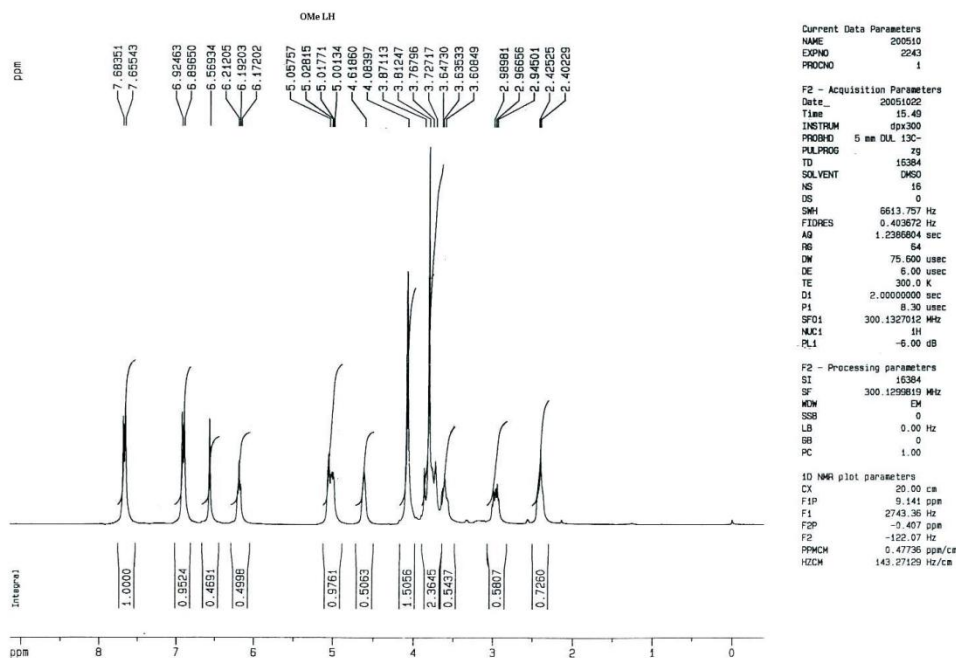

$^1\text{H}$  NMR spectrum (Bruker, 300MHz, mixture of  $\text{CDCl}_3$  & DMSO) of compound **6b**

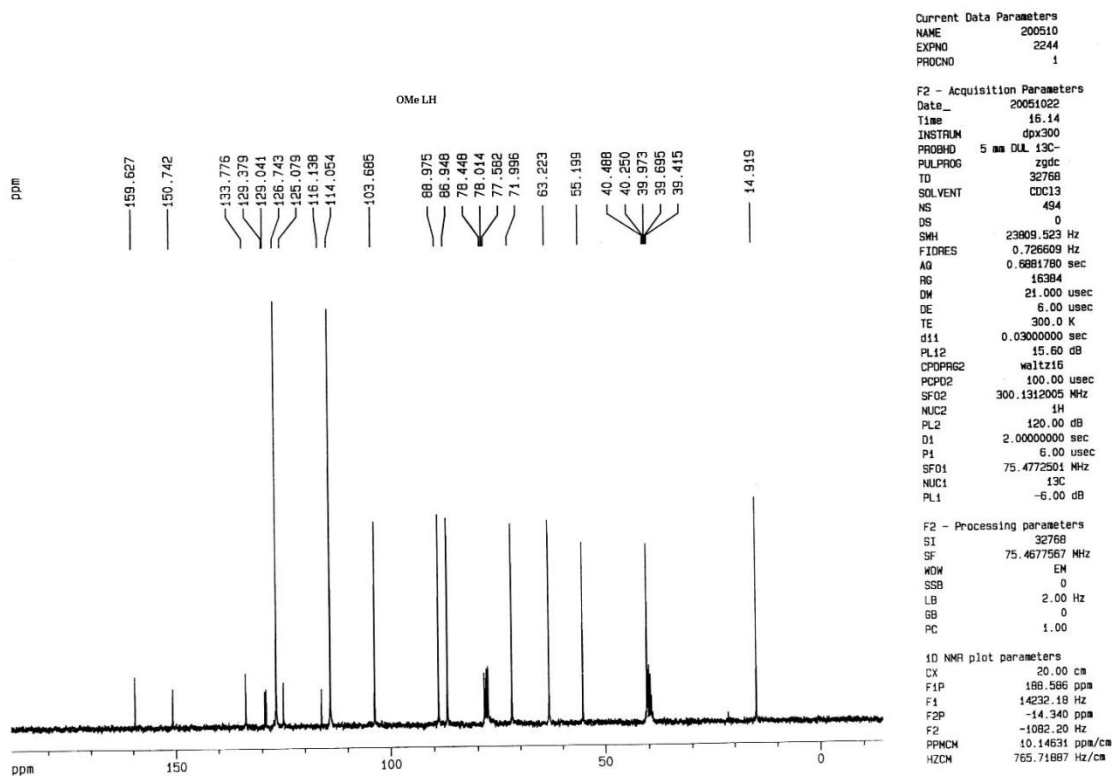

$^{13}\text{C}$  NMR spectrum (Bruker, 75.5MHz, mixture of  $\text{CDCl}_3$  & DMSO) of compound **6b**

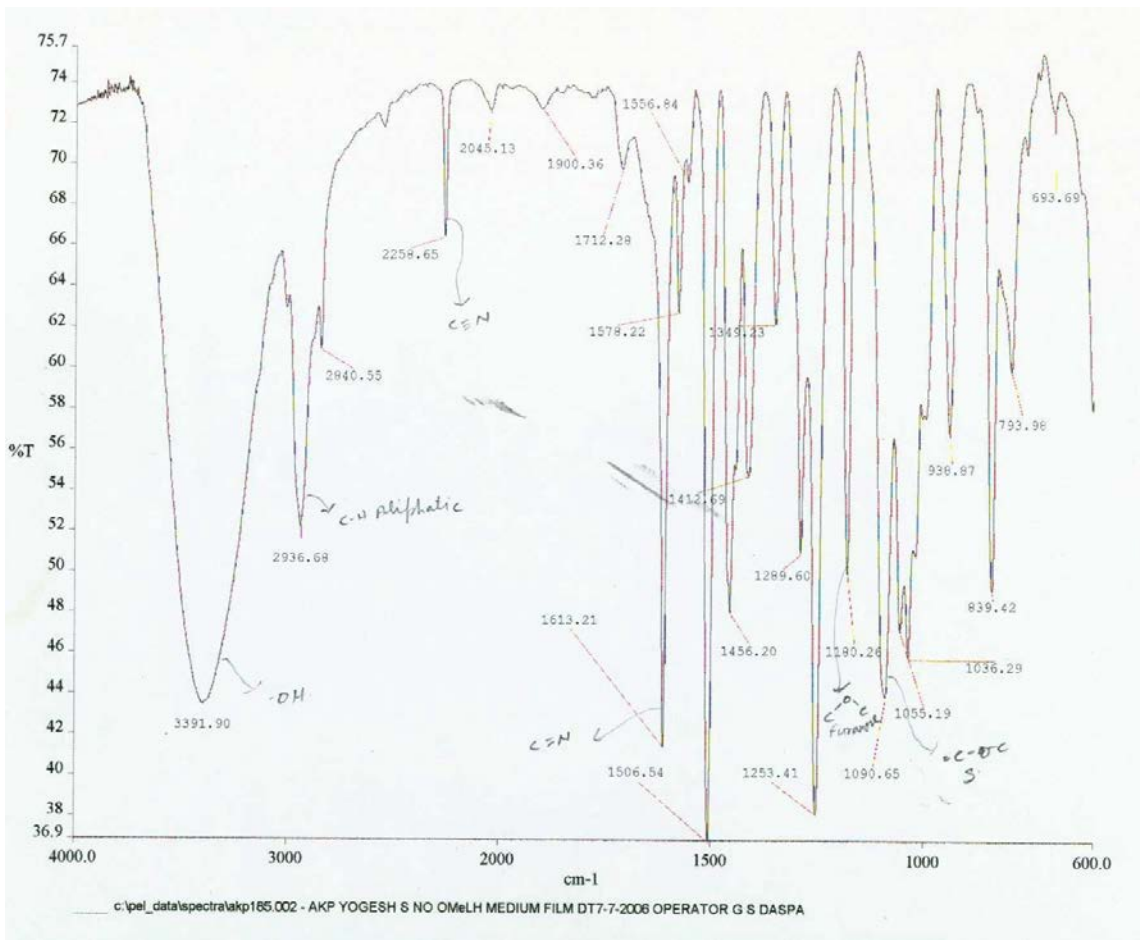

IR spectrum (Perkin-Elmer 2000 FT-IR spectrophotometer) of compound **6b**

2'-Deoxy-1'-(5-cyanomethyl-3-p-fluorophenyl)pyrazolyl-β-D-ribofuranose (6c)

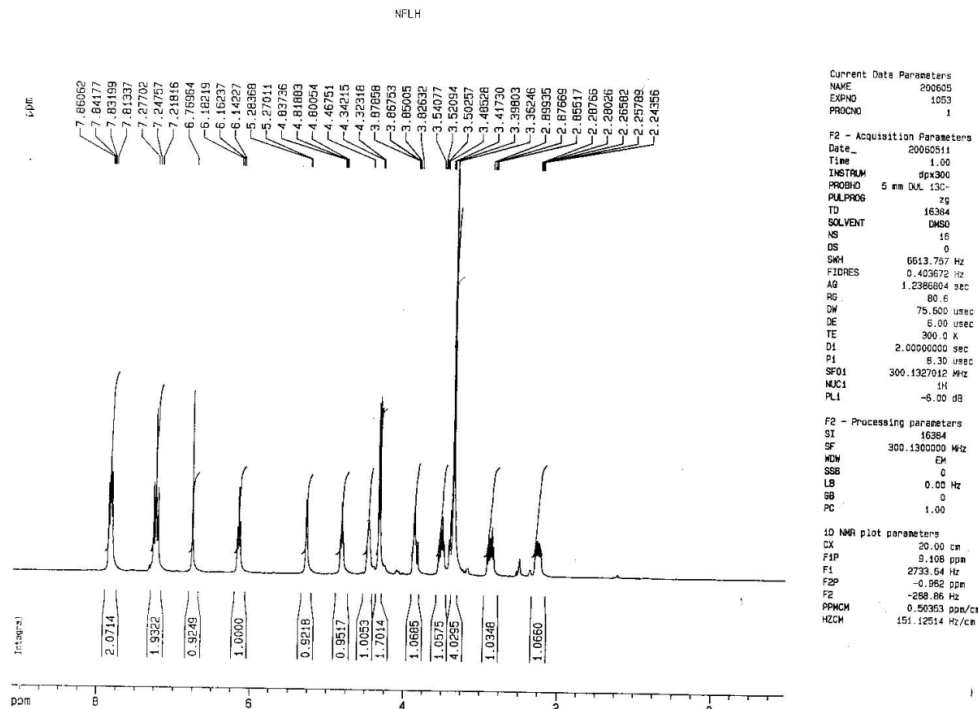

<sup>1</sup>H NMR spectrum (Bruker, 300MHz, DMSO) of compound 6c

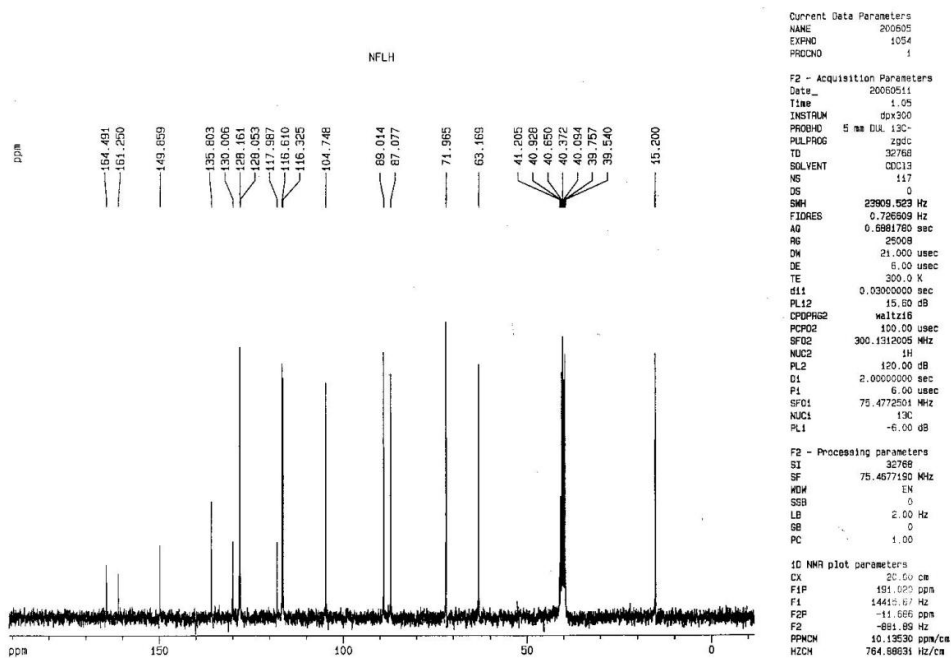

<sup>13</sup>C NMR spectrum (Bruker, 75.5MHz, CDCl<sub>3</sub>) of compound 6c

2'-Deoxy-1'-(5-cyanomethyl-3-p-chlorophenyl)pyrazolyl-β-D-ribofuranose (6d).

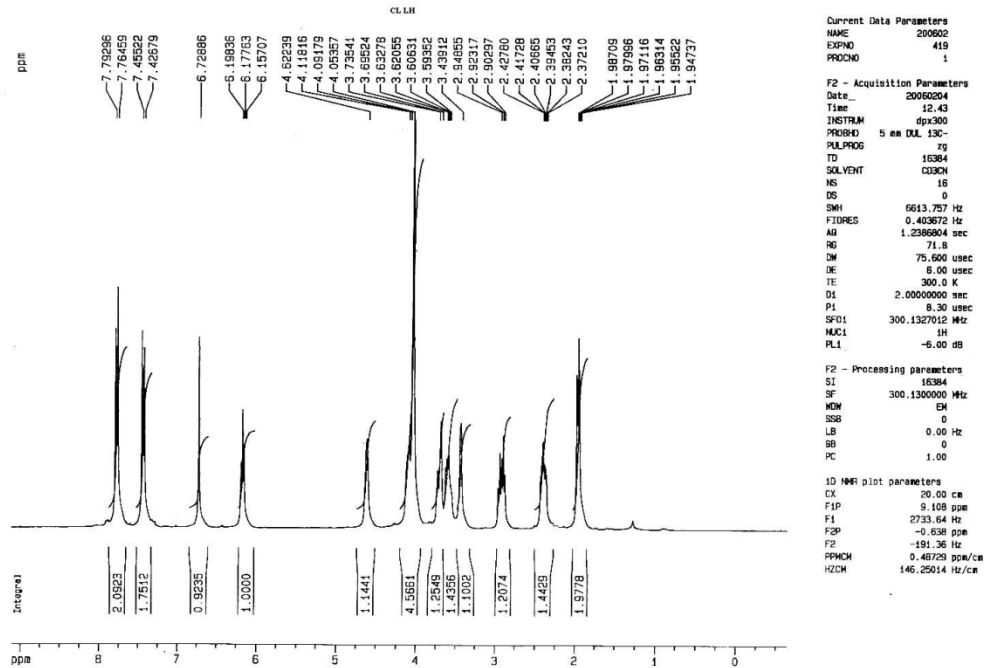

<sup>1</sup>H NMR spectrum (Bruker, 300MHz, CD<sub>3</sub>CN) of compound 6d

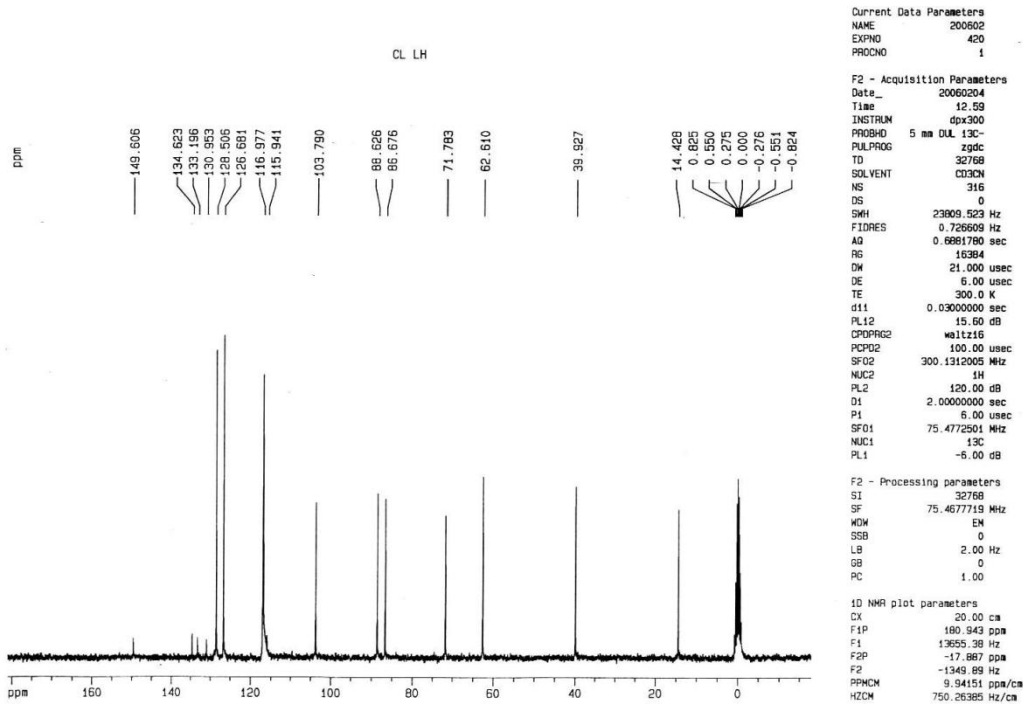

<sup>13</sup>C NMR spectrum (Bruker, 75.5MHz, CD<sub>3</sub>CN) of compound 6d

**2'-Deoxy-1'-(3-*p*-bromophenyl-5-cyanomethyl)pyrazolyl- $\beta$ -D-ribofuranose (6e).**

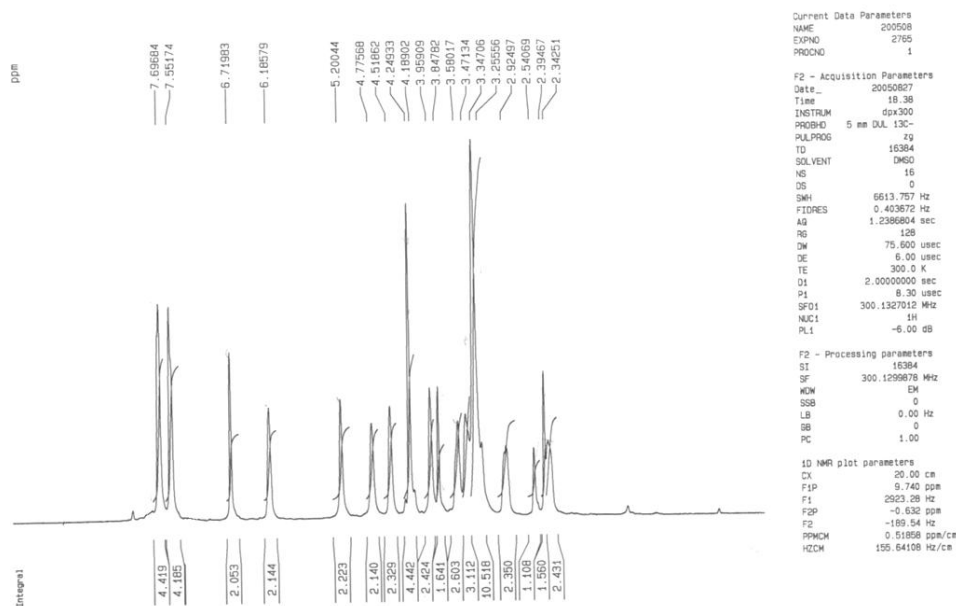

```

Current Data Parameters
NAME      200508
EXPNO    2765
PROCNO   1

F2 - Acquisition Parameters
Date_    20050827
Time     18.38
INSTRUM  dpx300
PROBHD   5 mm DUL 13C-
PULPROG  zg
TD        16384
SOLVENT  DMSO
NS        0
DS        0
SWH       6613.757 Hz
FIDRES   0.403672 Hz
AQ        1.2386804 sec
RG        128
DW        75.600 usec
DE        6.00 usec
TE        300.0 K
D1        2.00000000 sec
P1        8.30 usec
SFO1     300.1327012 MHz
NUC1     1H
PL1      -6.00 dB

F2 - Processing parameters
SI        16384
SF        300.1299878 MHz
WDW       EM
SSB       0
LB        0.00 Hz
GB        0
PC        1.00

ID NMR plot parameters
CX        20.00 cm
F1P       9.740 ppm
F1        2923.28 Hz
F2P      -0.532 ppm
F2       -189.54 Hz
PPMCH    0.51858 ppm/cm
HZCM     155.64108 Hz/cm
    
```

<sup>1</sup>H NMR spectrum (Bruker, 300MHz, mixture of CDCl<sub>3</sub> & DMSO) of compound **6e**

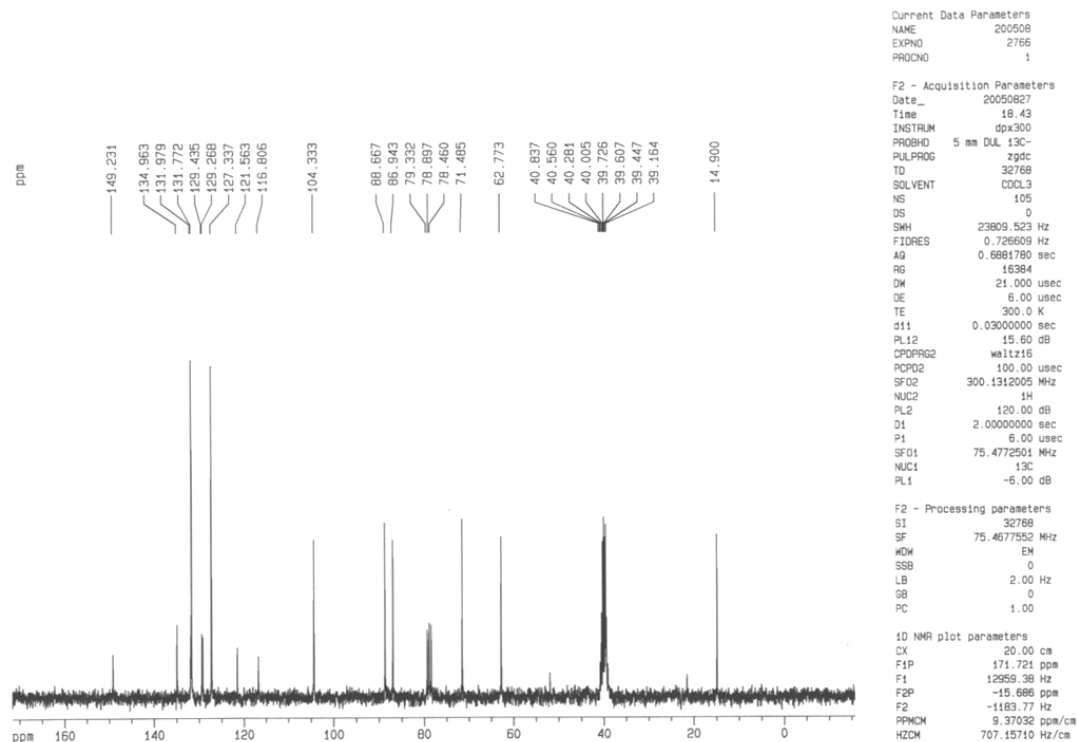

```

Current Data Parameters
NAME      200508
EXPNO    2766
PROCNO   1

F2 - Acquisition Parameters
Date_    20050827
Time     18.43
INSTRUM  dpx300
PROBHD   5 mm DUL 13C-
PULPROG  zgdc
TD        32768
SOLVENT  CDCL3
NS        105
DS        0
SWH       23809.523 Hz
FIDRES   0.726609 Hz
AQ        0.6881780 sec
RG        16384
DW        21.000 usec
DE        6.00 usec
TE        300.0 K
d11       0.03000000 sec
PL12     15.60 dB
CPDPRG2  waltz16
PCPD2    100.00 usec
SFO2     300.1312005 MHz
NUC2     13C
PL2      120.00 dB
D1        2.00000000 sec
P1        6.00 usec
SFO1     75.4772501 MHz
NUC1     13C
PL1      -6.00 dB

F2 - Processing parameters
SI        32768
SF        75.4677552 MHz
WDW       EM
SSB       0
LB        2.00 Hz
GB        0
PC        1.00

ID NMR plot parameters
CX        20.00 cm
F1P       171.721 ppm
F1        12959.38 Hz
F2P      -15.686 ppm
F2       -1183.77 Hz
PPMCH    9.37032 ppm/cm
HZCM     707.15710 Hz/cm
    
```

<sup>13</sup>C NMR spectrum (Bruker, 75.5MHz, mixture of CDCl<sub>3</sub> & DMSO) of compound **6e**
